# Supplementary material for: Weinreb amide directed cross-coupling reaction between electron-deficient alkenes catalyzed by a rhodium catalyst
Source: Royal Society of Chemistry journal article supplement (doi:10.1039/c7ob00026j), 2017-01-01

**Supporting Information**  
**For the article entitled**

**Weinreb Amide Directed Cross-Coupling Reaction of  
Electron-deficient Alkenes Catalyzed by Rhodium  
Catalyst**

**Feifei Li, Chunbing Yu, Jian Zhang\* and Guofu Zhong\***

*College of Materials, Chemistry and Chemical Engineering, Hangzhou Normal University, Hangzhou  
310036, China.*

E-mail: [zhangjian@hznu.edu.cn](mailto:zhangjian@hznu.edu.cn);

[zgf@hznu.edu.cn](mailto:zgf@hznu.edu.cn)

**Table of contents**

|                                                                         |    |
|-------------------------------------------------------------------------|----|
| General Methods                                                         | 2  |
| General Procedure for the Cross-Coupling of Weinreb amides with Alkenes | 2  |
| Characterization Data for the Dienamides                                | 2  |
| Gram-Scaled Synthesis                                                   | 10 |
| Selective Reduction                                                     | 11 |
| Deuterium Labeled Experiments                                           | 11 |
| References                                                              | 12 |
| <sup>1</sup> H, <sup>13</sup> C Spectra                                 | 13 |

## General Methods

All commercially available reagents for the cross-coupling reaction were used as received: AR grade 1, 2-dichloroethane, was obtained from TCI and used as received.  $[\text{RhCp}^*\text{Cl}_2]_2$ ,  $[\text{RuCl}_2(p\text{-cymene})]_2$  and  $\text{AgSbF}_6$  were obtained from Energy Chemical.  $\text{Cu}(\text{OAc})_2$  was purchased from Alfa Aesar. The desired Weinreb acrylamides and the corresponding acrylic acid were prepared according to the reported method.<sup>[1-5]</sup> All cross-coupling reactions were run in vials under sealed argon atmosphere. Thin-layer chromatography (TLC) was conducted with pre-coated silica gel plate (0.2 mm thickness) and visualized with UV and potassium permanganate staining, followed by heating on a hot plate. Flash chromatography was performed using silica gel 60 with distilled solvents.  $^1\text{H}$  NMR spectra were performed on a Bruker 500 NMR spectrometer and are reported in ppm downfield from  $\text{SiMe}_4$  ( $\delta = 0.0$ ) and relative to the signal of chloroform-*d* ( $\delta = 7.27$  ppm, singlet). Data reported as: s = singlet, d = doublet, t = triplet, q = quartet, m = multiplet, b = broad; coupling constant(s) in Hz; integration. Proton-decoupled  $^{13}\text{C}$  NMR spectra were recorded on a 500 (125 MHz) or ECA-400 (100 MHz) spectrometer and are reported in ppm using solvent as an internal standard ( $\text{CDCl}_3$  at 77.23 ppm). IR spectra were recorded as thin films on KBr plates on a Bio-Rad FTS 165 FTIR spectrometer and are reported in frequency of absorption ( $\text{cm}^{-1}$ ). High resolution mass spectral analysis (HRMS) was performed on Waters Q-ToF Premier Mass Spectrometer.

## General Procedure for Cross-Coupling of Acrylamides with Alkenes

An oven-dried screw-cap vial was charged with  $[\text{RhCp}^*\text{Cl}_2]_2$  (2.5 mol%, 0.005 mmol),  $\text{AgSbF}_6$  (10 mol%, 0.02 mmol),  $\text{Cu}(\text{OAc})_2$  (2.0 equiv, 0.4 mmol) and DCE (1 mL). Then, acrylamide (1.0 equiv, 0.2 mmol) and acrylate (2.0 equiv, 0.4 mmol) were added into the solution in sequence. The vial was sealed under argon and heated to 120 °C with stirring for 16 hours. After cooling down, the mixture was directly applied to a flash column chromatography (EtOAc/petroleum ether mixtures).

## Characterization Data for the Butadienes

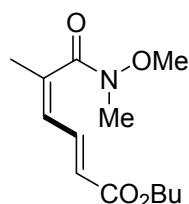

(2*E*, 4*Z*)-Butyl 6-(methoxy(methyl)amino)-5-methyl-6-oxohexa-2,4-dienoate (**3a**): This compound was prepared by the general procedure described above and was obtained as an orange oil. Yield = 80 %.  $^1\text{H}$  NMR (500 MHz,  $\text{CDCl}_3$ ):  $\delta$  7.27 (dd,  $J = 15.0, 11.5$  Hz, 1H), 6.13 (d,  $J = 11.5$  Hz, 1H), 5.89 (d,  $J = 15.0$  Hz, 1H), 4.14 (t,  $J = 6.5$  Hz, 2H), 3.61 (s, 3H), 3.26 (s, 3H), 2.08 (s, 3H), 1.66-1.60 (m, 2H), 1.39 (m, 2H), 0.94 (t,  $J = 7.5$  Hz, 3H).  $^{13}\text{C}$  NMR (125 MHz,  $\text{CDCl}_3$ ):  $\delta$  171.1, 166.7, 142.8, 140.1, 126.2, 122.1, 64.3, 61.8, 32.1, 31.1, 20.7, 19.1, 13.7. HR-MS (ESI): Calculated for  $\text{C}_{16}\text{H}_{21}\text{NO}_4$ :  $[\text{M}+\text{H}]^+$  256.1543. Found:  $m/z$  256.1542. FTIR (KBr,  $\text{cm}^{-1}$ ):  $\nu$  3507.68, 2957.85, 2932.54, 2857.87, 1715.65, 1652.43, 1634.89, 1273.67, 1147.72, 995.68.

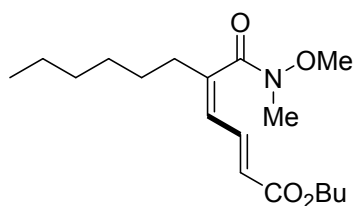

(*2E,4Z*)-Butyl 6-(methoxy(methyl)amino)-5-hexyl-6-oxohexa-2,4-dienoate (**3b**): This compound was prepared by the general procedure described above and was obtained as an orange oil, yield = 51 %. <sup>1</sup>H NMR (500 MHz, CDCl<sub>3</sub>): δ 7.30 (dd, *J* = 15.0 Hz, 11.5 Hz, 1H), 6.12 (d, *J* = 11.5 Hz, 1H), 5.90 (d, *J* = 15.0 Hz, 1H), 4.13 (t, *J* = 6.5 Hz, 2H), 3.57 (s, 3H), 3.27 (s, 3H), 2.35 (t, *J* = 7.5 Hz, 2H), 1.60-1.66 (m, 2H), 1.47-1.53 (m, 2H), 1.25-1.42 (m, 8H), 0.94 (t, *J* = 7.5 Hz, 3H), 0.88 (t, *J* = 7.0 Hz, 3H). <sup>13</sup>C NMR (125 MHz, CDCl<sub>3</sub>): δ 170.3, 166.8, 147.8, 140.4, 124.9, 122.2, 64.3, 61.7, 34.6, 32.1, 31.6, 30.7, 29.0, 27.5, 22.6, 19.2, 14.1, 13.7. HR-MS (ESI): Calculated for C<sub>18</sub>H<sub>31</sub>NO<sub>4</sub>: [M+H]<sup>+</sup> 326.2326. Found: *m/z* 326.2332. FTIR (KBr, cm<sup>-1</sup>): ν 3507.68, 2957.85, 2932.54, 2857.87, 1715.65, 1652.43, 1634.89, 1455.86, 1385.22, 1273.67, 1147.72, 995.68.

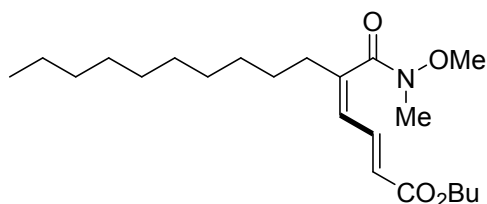

(*2E,4Z*)-Butyl 6-(methoxy(methyl)amino)-5-decyl-6-oxohexa-2,4-dienoate (**3c**): this compound was prepared by the general procedure described above and was obtained as an orange oil. Yield = 45%. <sup>1</sup>H NMR (500 MHz, CDCl<sub>3</sub>): δ 7.30 (dd, *J* = 15.0 Hz, 12.0 Hz, 1H), 6.12 (d, *J* = 12.0 Hz, 1H), 5.87 (d, *J* = 15.0 Hz, 1H), 4.13 (t, *J* = 6.5 Hz, 2H), 3.57 (s, 3H), 3.27 (s, 3H), 2.36 (t, *J* = 7.5 Hz, 2H), 1.60-1.67 (m, 2H), 1.47-1.53 (m, 2H), 1.36-1.41 (m, 2H), 1.30-1.22 (m, 16H), 0.94 (t, *J* = 7.0 Hz, 3H), 0.88 (t, *J* = 6.5 Hz, 3H). <sup>13</sup>C NMR (125 MHz, CDCl<sub>3</sub>): δ 170.3, 166.8, 147.8, 140.4, 124.9, 122.1, 66.4, 64.3, 61.7, 34.6, 31.9, 30.7, 29.7, 29.6, 29.5, 29.4, 29.3, 27.5, 22.7, 19.2, 14.1, 13.7. HR-MS (ESI): Calculated for C<sub>22</sub>H<sub>39</sub>NO<sub>4</sub>: [M+H]<sup>+</sup> 324.1576. Found: *m/z* 324.1578. FTIR (KBr, cm<sup>-1</sup>): ν 2925.67, 1715.95, 1660.33, 1455.58, 1273.96, 1147.04.

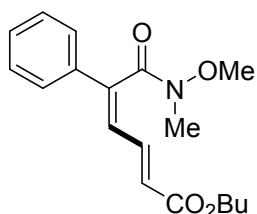

(*2E,4Z*)-Butyl 6-(methoxy(methyl)amino)-5-phenyl-6-oxohexa-2,4-dienoate (**3d**): This compound was prepared by the general procedure described above and was obtained as an orange oil. Yield = 85%. <sup>1</sup>H NMR (500 MHz, CDCl<sub>3</sub>): δ 7.31-7.50 (m, 5H), 6.72 (d, *J* = 12.0 Hz, 1H), 6.08 (d, *J* = 16.5 Hz, 1H), 4.17 (t, *J* = 6.5 Hz, 2H), 3.41 (s, 3H), 3.36 (s, 3H), 1.61-1.69 (m, 2H), 1.34-1.45 (m, 2H), 0.95 (t, *J* = 7.5 Hz, 3H). <sup>13</sup>C NMR (125 MHz, CDCl<sub>3</sub>): δ 169.1, 166.6, 144.8, 140.0, 135.2, 129.2, 128.9, 126.1, 124.5, 124.2, 64.5, 61.6, 32.3, 30.7, 19.2, 13.7. HR-MS (ESI): Calculated for C<sub>18</sub>H<sub>23</sub>NO<sub>4</sub>: [M+H]<sup>+</sup> 324.1576. Found: *m/z* 324.1578. FTIR (KBr, cm<sup>-1</sup>): ν 3473.03, 2948.71, 2357.99, 1715.84, 1657.10, 1434.96, 1360.86, 1244.09, 1161.29, 1080.86, 997.07, 901.38, 761.69.

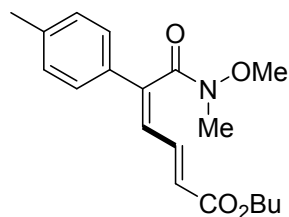

(*2E,4Z*)-Butyl 6-(methoxy(methyl)amino)-5-(*p*-tolyl)-6-oxohexa-2,4-dienoate (**3e**): This compound was prepared by the general procedure described above and was obtained as an orange oil. Yield = 71 %. <sup>1</sup>H NMR (500 MHz, CDCl<sub>3</sub>): δ 7.41 (dd, *J* = 15.0 Hz, 11.5 Hz, 1H), 7.33 (d, *J* = 8.0 Hz, 2H), 7.18 (d, *J* = 8.0 Hz, 2H), 6.70 (d, *J* = 11.5 Hz, 1H), 6.06 (d, *J* = 15.0 Hz, 1H), 4.16 (t, *J* = 6.5 Hz, 2H), 3.41 (s, 3H), 3.36 (s, 3H), 2.36 (s, 3H), 1.62-1.68 (m, 2H), 1.37-1.44 (m, 2H), 0.95 (t, *J* = 7.5 Hz, 3H). <sup>13</sup>C NMR (125 MHz, CDCl<sub>3</sub>): δ 169.3, 166.7, 144.7, 140.2, 139.5, 132.3, 129.6, 125.9, 123.6, 123.5, 64.4, 61.5, 32.3, 30.7, 21.2, 19.2, 13.7. HR-MS (ESI): Calculated for C<sub>19</sub>H<sub>25</sub>NO<sub>4</sub>: [M+H]<sup>+</sup> 318.1700. Found: *m/z* 318.1694. FTIR (KBr, cm<sup>-1</sup>): ν 3473.03, 2948.71, 2357.99, 1715.84, 1657.10, 1434.96, 1360.86, 1244.09, 1161.29, 1080.86, 997.07, 901.38, 761.69.

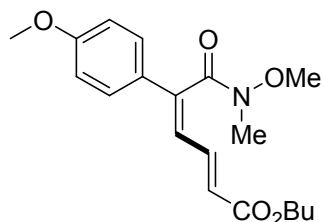

(*2E,4Z*)-Butyl 6-(methoxy(methyl)amino)-5-(4-methoxyphenyl)-6-oxohexa-2,4-dienoate (**3f**): This compound was prepared by the general procedure described above and was obtained as an orange oil. Yield = 76 %. <sup>1</sup>H NMR (500 MHz, CDCl<sub>3</sub>): δ 7.38-7.43 (m, 3H), 6.90 (d, *J* = 9.0 Hz, 2H), 6.64 (d, *J* = 11.5 Hz, 1H), 6.04 (d, *J* = 15.0 Hz, 1H), 4.16 (t, *J* = 6.5 Hz, 2H), 3.83 (s, 3H), 3.43 (s, 3H), 3.37 (s, 3H), 1.62-1.68 (m, 2H), 1.37-1.43 (m, 2H), 0.95 (t, *J* = 7.5 Hz, 3H). <sup>13</sup>C NMR (125 MHz, CDCl<sub>3</sub>): δ 169.4, 166.7, 160.5, 144.4, 140.4, 130.3, 127.6, 123.1, 122.4, 114.3, 64.4, 61.5, 55.4, 32.2, 30.6, 19.2, 13.7. HR-MS (ESI): Calculated for C<sub>19</sub>H<sub>25</sub>NO<sub>4</sub>: [M+H]<sup>+</sup> 348.1805. Found: *m/z* 348.1808. FTIR (KBr, cm<sup>-1</sup>): ν 2958.93, 1712.47, 1651.65, 1601.02, 1512.10, 1384.98, 1253.58, 1180.25, 1140.08, 1030.62.

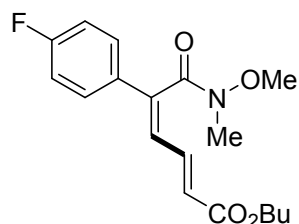

(*2E,4Z*)-Butyl 6-(methoxy(methyl)amino)-5-(4-fluorophenyl)-6-oxohexa-2,4-dienoate (**3g**): This compound was prepared by the General Procedure described above and was obtained as an orange oil. Yield = 90 %. <sup>1</sup>H NMR (500 MHz, CDCl<sub>3</sub>): δ 7.48-7.36 (m, 3H), 7.10- 7.03 (m, 2H), 6.66 (d, *J* = 11.5 Hz, 1H), 6.08 (d, *J* = 15.0 Hz, 1H), 4.16 (q, *J* = 6.5 Hz, 2H), 3.43 (s, 3H), 3.36 (s, 3H), 1.71-1.62 (m, 2H), 1.47-1.36 (m, 2H), 0.95 (t, *J* = 7.5 Hz, 3H). <sup>13</sup>C NMR (125 MHz, CDCl<sub>3</sub>): δ 168.9, 166.5, 163.2 (d, *J* = 248.60 Hz), 143.6, 139.9, 131.4 (d, *J* = 3.25 Hz), 127.9 (d, *J* = 8.125 Hz), 124.4 (d, *J* = 1.38 Hz), 124.3, 116.0 (d, *J* = 21.75 ), 64.5, 61.7, 32.3, 30.7, 19.2, 13.7. HR-MS (ESI): Calculated for C<sub>18</sub>H<sub>22</sub>FNO<sub>4</sub>: [M+H]<sup>+</sup> 336.1606. Found: *m/z* 336.1614. FTIR (KBr, cm<sup>-1</sup>): ν

2959.29, 1712.77, 1652.17, 1600.39, 1508.20, 1384.88, 1239.60, 1141.51, 1005.96, 836.68.

Melting point: 81-82°C.

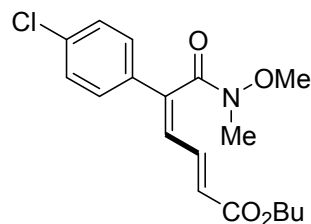

(2*E*, 4*Z*)-Butyl 6-(methoxy(methyl)amino)-5-(4-chlorophenyl)-6-oxohexa-2, 4-dienoate (**3h**):

This compound was prepared by the general procedure described above and was obtained as an orange oil. Yield = 81%. <sup>1</sup>H NMR (500 MHz, CDCl<sub>3</sub>): δ 7.34-7.43 (m, 5H), 6.70 (d, *J* = 12.0 Hz, 1H), 6.10 (d, *J* = 15.0 Hz, 1H), 4.16 (t, *J* = 7.0 Hz, 2H), 3.43 (s, 3H), 3.36 (s, 3H), 1.70 - 1.62 (m, 2H), 1.45 - 1.36 (m, 2H), 0.95 (t, *J* = 7.5 Hz, 3H). <sup>13</sup>C NMR (125 MHz, CDCl<sub>3</sub>): δ 168.6, 166.4, 143.4, 139.7, 135.2, 133.7, 129.2, 127.3, 125.0, 124.7, 64.5, 61.7, 32.3, 30.7, 19.2, 13.8. HR-MS (ESI): Calculated for C<sub>18</sub>H<sub>22</sub>ClNO<sub>4</sub>: [M+H]<sup>+</sup> 352.1310. Found: *m/z* 352.1301. FTIR (KBr, cm<sup>-1</sup>): ν 2958.57, 2358.07, 2651.89, 1714.14, 1385.07, 1238.27, 1184.84, 1142.15, 1011.82. Melting point: 75-76°C

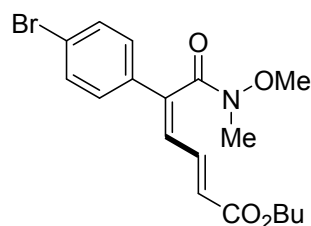

(2*E*, 4*Z*)-Butyl 6-(methoxy(methyl)amino)-5-(4-bromophenyl)-6-oxohexa-2,4-dienoate (**3i**): This compound was prepared by the general procedure described above and was obtained as an orange oil. Yield = 76 %. <sup>1</sup>H NMR (500 MHz, CDCl<sub>3</sub>): δ 7.51 (d, *J* = 8.5 Hz, 2H), 7.40 (dd, *J* = 11.5 Hz, 15.0 Hz, 1H), 7.31 (d, *J* = 8.5 Hz, 2H), 6.70 (d, *J* = 11.5 Hz, 1H), 6.10 (d, *J* = 15.0 Hz, 1H), 4.17 (t, *J* = 6.5 Hz, 2H), 3.42 (s, 3H), 3.36 (s, 3H), 1.61- 1.71 (m, 2H), 1.34- 1.47 (m, 2H), 0.92-0.97 (t, *J* = 7.5 Hz, 3H). <sup>13</sup>C NMR (125 MHz, CDCl<sub>3</sub>): δ 168.6, 166.4, 143.5, 139.7, 134.2, 132.1, 127.5, 125.0, 124.8, 123.5, 64.5, 61.7, 32.3, 30.7, 19.2, 13.7. HR-MS (ESI): Calculated for C<sub>18</sub>H<sub>22</sub>BrNO<sub>4</sub>: [M+H]<sup>+</sup> 396.0805. Found: *m/z* 396.0796. FTIR (KBr, cm<sup>-1</sup>): ν 2958.86, 1712.63, 1658.44, 1625.00, 1385.50, 1238.12, 1184.74, 1142.02, 1007.82, 979.32, 825.94. Melting point: 94-95°C.

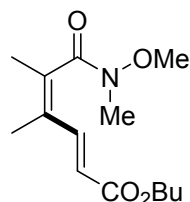

(2*E*, 4*Z*)-Butyl 6-(methoxy(methyl)amino)-4,5-dimethyl-6-oxohexa-2,4-dienoate (**3j**): This compound was prepared by the general procedure described above and was obtained as an orange oil. Yield = 50%. <sup>1</sup>H NMR (500 MHz, CDCl<sub>3</sub>): δ 7.44 (d, *J* = 15.5 Hz, 1H), 5.92 (d, *J* = 15.5 Hz, 1H), 4.14 (t, *J* = 6.5 Hz, 2H), 3.55 (s, 3H), 3.29 (s, 3H), 2.02 (s, 3H), 1.87 (s, 3H), 1.68 -1.57 (m, 2H), 1.40 (m, 2H). 0.94 (t, *J* = 7.5 Hz, 3H). <sup>13</sup>C NMR (125 MHz, CDCl<sub>3</sub>): δ 171.8, 167.1, 143.4,

139.2, 129.4, 118.4, 64.3, 61.6, 32.2, 30.7, 19.2, 17.0, 13.7, 13.1. HR-MS (ESI): Calculated for  $C_{14}H_{23}NO_4$ :  $[M+H]^+$  328.2952. Found:  $m/z$  382.2940. FTIR (KBr,  $cm^{-1}$ ):  $\nu$  2924.97, 1713.67, 1651.89, 1622.61, 1385.01, 1286.55, 1173.88, 983.81.

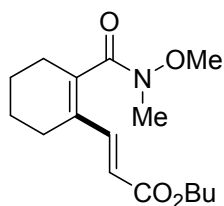

Butyl (*E*)-3-(2-methoxy(methyl)carbamoylcyclohex-1-enyl) acrylate (**3k**): This compound was prepared by the general procedure described above and was obtained as an orange oil. Yield = 56%.  $^1H$  NMR (500 MHz,  $CDCl_3$ ):  $\delta$  7.40 (d,  $J$  = 16.0 Hz, 1H), 5.89 (d,  $J$  = 15.5 Hz, 1H), 4.14 (t,  $J$  = 6.5 Hz, 2H), 3.56 (s, 3H), 3.28 (s, 3H), 2.38 (brs, 2H), 2.24 (brs, 2H), 1.60-1.74 (m, 6H), 1.35-1.43 (m, 2H), 0.94 (t,  $J$  = 7.5 Hz, 3H).  $^{13}C$  NMR (125 MHz,  $CDCl_3$ ):  $\delta$  171.4, 167.1, 142.7, 142.0, 130.0, 117.5, 64.2, 61.7, 32.3, 30.7, 27.6, 24.2, 21.7, 21.6, 19.2, 13.7. HR-MS (ESI): Calculated for  $C_{16}H_{25}NO_4$ :  $[M+H]^+$  296.1856. Found:  $m/z$  296.1849. FTIR (KBr,  $cm^{-1}$ ):  $\nu$  2933.90, 1713.10, 1651.82, 1626.82, 1380.32, 1295.65, 1171.77, 983.61

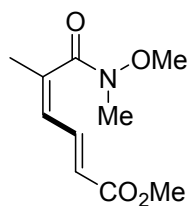

(2*E*,4*Z*)-Methyl 6-(methoxy(methyl)amino)-5-methyl-6-oxohexa-2,4-dienoate (**3l**): This compound was prepared by the general procedure described above and was obtained as an orange oil. Yield = 65%.  $^1H$  NMR (500 MHz,  $CDCl_3$ ):  $\delta$  7.29 (dd,  $J$  = 12.0 Hz, 15.5 Hz, 1H), 6.14 (d,  $J$  = 12.0 Hz, 1H), 5.89 (d,  $J$  = 15.5 Hz, 1H), 3.73 (s, 3H), 3.61 (s, 3H), 3.28 (s, 3H), 2.08 (s, 3H).  $^{13}C$  NMR (125 MHz,  $CDCl_3$ ):  $\delta$  170.2, 167.1, 143.1, 140.3, 126.3, 121.8, 61.8, 51.61, 32.1, 20.7. HR-MS (ESI): Calculated for  $C_{10}H_{15}NO_4$ :  $[M+H]^+$  214.1074. Found:  $m/z$  214.1082. FTIR (KBr,  $cm^{-1}$ ):  $\nu$  3507.85, 2933.95, 1715.44, 1651.74, 1455.36, 1275.87, 1149.14, 992.02, 753.77.

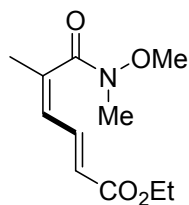

(2*E*, 4*Z*)-Ethyl 6-(methoxy(methyl)amino)-5-methyl-6-oxohexa-2,4-dienoate (**3m**): This compound was prepared by the general procedure described above and was obtained as an orange oil. Yield = 74 %.  $^1H$  NMR (500 MHz,  $CDCl_3$ ):  $\delta$  7.27 (dd,  $J$  = 15.0, 11.5 Hz, 1H), 6.13 (d,  $J$  = 11.5 Hz, 1H), 5.88 (d,  $J$  = 15.5 Hz, 1H), 4.18 (q,  $J$  = 7.0 Hz, 2H), 3.60 (s, 3H), 3.28 (s, 3H), 2.07 (s, 3H), 1.28 (t,  $J$  = 7.0 Hz, 3H).  $^{13}C$  NMR (125 MHz,  $CDCl_3$ ):  $\delta$  170.3, 166.7, 142.8, 140.1, 126.3, 122.2, 61.8, 60.4, 32.2, 20.7, 14.3. HR-MS (ESI): Calculated for  $C_{11}H_{17}NO_4$ :  $[M+H]^+$  228.1230.

Found: m/z 228.1235. FTIR (KBr, cm<sup>-1</sup>):  $\nu$  2934.16, 1715.47, 1651.98, 1455.31, 1385.12, 1332.33, 1275.93, 1151.58, 993.68,

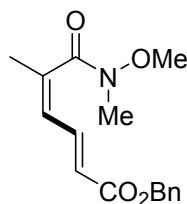

(2*E*, 4*Z*)-Benzyl 6-(methoxy(methyl) amino)-5-methyl-6-oxohexa-2, 4-dienoate (**3n**): This compound was prepared by the general procedure described above and was obtained as an orange oil. Yield = 67 %. <sup>1</sup>H NMR (500 MHz, CDCl<sub>3</sub>):  $\delta$  7.30- 7.36 (m, 6H), 6.12 (d, *J* = 11.5 Hz, 1H), 5.93 (d, *J* = 15.0 Hz, 1H), 5.18 (s, 2H), 3.58(s, 3H), 3.26 (s, 3H), 2.06 (s, 3H). <sup>13</sup>C NMR (125 MHz, CDCl<sub>3</sub>):  $\delta$  170.3, 166.5, 143.2, 140.7, 136.0, 128.6, 128.3, 128.2, 126.2, 121.7, 66.2, 61.8, 32.1, 20.9. HR-MS (ESI): Calculated for C<sub>16</sub>H<sub>19</sub>NO<sub>4</sub>: [M+H]<sup>+</sup> 290.1387. Found: m/z 290.1395. FTIR (KBr, cm<sup>-1</sup>):  $\nu$  2934.16, 1715.47, 1651.75, 1455.38, 1385.05, 1333.38, 1275.92, 1149.20, 992.26.

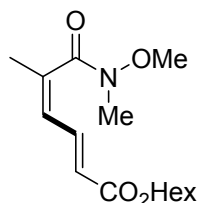

(2*E*, 4*Z*)-Hexyl 6-(methoxy(methyl)amino)-5-methyl-6-oxohexa-2, 4-dienoate (**3o**): This compound was prepared by the general procedure described above and was obtained as an orange oil. Yield = 57 %. <sup>1</sup>H NMR (500 MHz, CDCl<sub>3</sub>):  $\delta$  7.27 (dd, *J* = 15.5, 11.5 Hz, 1H), 6.14 (d, *J* = 11.5 Hz, 1H), 5.89 (d, *J* = 15.0 Hz, 1H), 4.13 (t, *J* = 6.5 Hz, 2H), 3.64 (s, 3H), 3.27 (s, 3H), 2.10 (s, 3H), 1.72 - 1.58 (m, 2H), 1.38-1.25 (m, 6H), 0.89 (t, *J* = 7.0 Hz, 3H). <sup>13</sup>C NMR (125 MHz, CDCl<sub>3</sub>):  $\delta$  170.3, 166.7, 142.8, 140.1, 125.4, 122.2, 64.6, 31.4, 29.5, 28.9, 25.3, 22.6, 20.7, 18.4, 14.1. HR-MS (ESI): Calculated for C<sub>16</sub>H<sub>22</sub>NO<sub>4</sub>: [M+H]<sup>+</sup> 284.1856. Found: m/z 284.1849. FTIR (KBr, cm<sup>-1</sup>):  $\nu$  2932.80, 1715.73, 1658.47, 1455.72, 1384.50, 1331.79, 1275.58, 1150.58, 995.12.

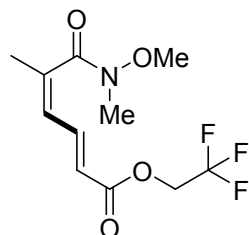

(2*E*, 4*Z*)-2,2,2-Trifluoroethyl 6-(methoxy(methyl)amino)-5-methyl-6-oxohexa-2,4-dienoate (**3p**): This compound was prepared by the general procedure described above and was obtained as an orange oil. Yield = 81%. <sup>1</sup>H NMR (500 MHz, CDCl<sub>3</sub>):  $\delta$  7.38 (dd, *J* = 15.5, 12.0 Hz, 1H), 6.17 (d, *J* = 11.5 Hz, 1H), 5.94 (d, *J* = 15.0 Hz, 1H), 4.51 (q, *J* = 8.5 Hz, 2H), 3.59 (s, 3H), 3.28 (s, 3H), 2.10 (s, 3H). <sup>13</sup>C NMR (125 MHz, CDCl<sub>3</sub>):  $\delta$  170.0, 164.9, 144.7, 142.6, 125.8, 123.0 (q, *J* = 280.1 Hz), 119.6, 61.8, 60.4 (q, *J* = 36.4 Hz), 29.7, 20.8. HR-MS (ESI): Calculated for C<sub>11</sub>H<sub>14</sub>F<sub>3</sub>NO<sub>4</sub>: [M+H]<sup>+</sup> 282.0948. Found: m/z 282.0953. FTIR (KBr, cm<sup>-1</sup>):  $\nu$  2920.43, 2849.49, 1732.40, 1651.61, 1455.40, 1287.85, 1167.97.

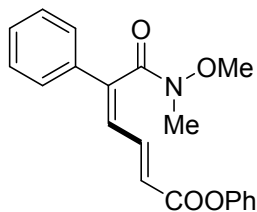

(*2E,4Z*)-Phenyl 6-(methoxy(methyl)amino)-5-phenyl-6-oxohexa-2,4-dienoate (**3q**): This compound was prepared by the general procedure described above and was obtained as a white solid. Yield = 79%.  $^1\text{H}$  NMR (400 MHz,  $\text{CDCl}_3$ )  $\delta$  = 7.61 (dd,  $J$  = 14.5, 18.5 Hz, 1H), 7.32-7.50 (m, 7H), 7.12-7.25 (m, 3H), 6.81 (d,  $J$  = 14.5 Hz, 1H), 6.27 (d,  $J$  = 19.0 Hz, 1H), 3.41 (s, 3H), 3.36 (s, 3H).  $^{13}\text{C}$  NMR (125 MHz,  $\text{CDCl}_3$ )  $\delta$  = 169.0, 164.8, 150.8, 145.9, 141.9, 135.1, 129.5, 129.4, 129.0, 126.2, 125.8, 124.3, 123.1, 121.6, 61.5, 32.2. HR-MS (ESI): Calculated for  $\text{C}_{20}\text{H}_{19}\text{NO}_4$ :  $[\text{M}+\text{H}]^+$  338.1387, Found:  $m/z$  338.1381. FTIR (KBr,  $\text{cm}^{-1}$ ):  $\nu$  3851.26, 3686.72, 3667.84, 3626.88, 3564.88, 2923.81, 2357.11, 1732.11, 1651.73, 1574.62, 1385.57, 1194.69, 1122.17, 688.33. Melting point: 113-114°C

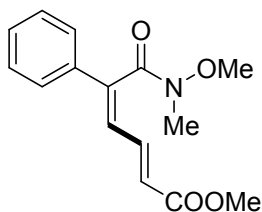

(*2E,4Z*)-Methyl 6-(methoxy(methyl)amino)-5-phenyl-6-oxohexa-2,4-dienoate (**3r**): This compound was prepared by the General Procedure described above and was obtained as a yellow solid. Yield = 68 %.  $^1\text{H}$  NMR (400 MHz,  $\text{CDCl}_3$ )  $\delta$  7.53- 7.32 (m, 6H), 6.72 (d,  $J$  = 11.5 Hz, 1H), 6.09 (d,  $J$  = 15.0 Hz, 1H), 3.76 (s, 3H), 3.47 (s, 3H), 3.38 (s, 3H).  $^{13}\text{C}$  NMR (125 MHz,  $\text{CDCl}_3$ )  $\delta$  = 169.0, 166.7, 144.9, 140.3, 135.2, 129.2, 128.9, 126.0, 124.5, 123.7, 61.6, 51.7, 32.3. HR-MS (ESI): Calculated for  $\text{C}_{15}\text{H}_{17}\text{NO}_4$ :  $[\text{M}+\text{H}]^+$  276.1230, Found:  $m/z$  276.1226. Melting point: 96-97°C.

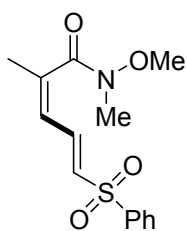

(*2Z,4E*)-*N*-Methoxy-*N*,2-dimethyl-5-(phenylsulfonyl)penta-2,4-dienamide (**3s**): This compound was prepared by the general procedure described above and was obtained as an orange oil. Yield = 85%.  $^1\text{H}$  NMR (500 MHz,  $\text{CDCl}_3$ ):  $\delta$  7.85-7.87 (m, 2H), 7.51-7.63 (m, 3H), 7.27 (dd,  $J$  = 12.0 Hz, 14.5 Hz, 1H), 6.37 (d,  $J$  = 14.5 Hz, 1H), 6.07 (d,  $J$  = 11.5 Hz, 1H), 3.60 (s, 3H), 3.29 (s, 3H), 2.08 (s, 3H).  $^{13}\text{C}$  NMR (125 MHz,  $\text{CDCl}_3$ ):  $\delta$  169.6, 146.0, 140.4, 138.1, 133.4, 130.5, 129.3, 127.6, 123.7, 62.0, 32.2, 20.9. HR-MS (ESI): Calculated for  $\text{C}_{14}\text{H}_{17}\text{NO}_4\text{S}$ :  $[\text{M}+\text{H}]^+$  296.0951. Found:  $m/z$  296.0940. FTIR (KBr,  $\text{cm}^{-1}$ ):  $\nu$  3508.32, 2936.77, 1651.10, 1588.18, 1446.15, 1386.44, 1306.73, 1145.48, 1084.92, 992.41, 825.61, 752.45, 608.18.



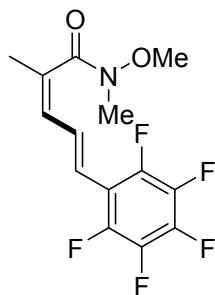

(2*Z*, 4*E*)-*N*-methoxy-*N*, 2-dimethyl-5-(perfluorophenyl) penta-2,4-dienamide (**3t**): This compound was prepared by the general procedure described above and was obtained as an orange oil. Yield = 30%. <sup>1</sup>H NMR (500 MHz, CDCl<sub>3</sub>): δ 7.07 (dd, *J* = 16.0, 11.0 Hz, 1H), 6.44 (d, *J* = 16.0 Hz, 1H), 6.19 (d, *J* = 11.0 Hz, 1H), 3.66 (s, 3H), 3.29 (s, 3H), 2.08 (s, 3H). <sup>13</sup>C NMR (125 MHz, CDCl<sub>3</sub>): δ 145.65 (m), 143.63 (m), 140.77 (m), 138.78 (m), 136.70 (m), 133.52, 128.99, 116.61 (m), 112.19 (m), 67.96, 25.60, 20.47. HR-MS (ESI): Calculated for C<sub>14</sub>H<sub>12</sub>F<sub>5</sub>NO<sub>4</sub>: [M+H]<sup>+</sup> 322.0861. Found: *m/z* 322.0854. FTIR (KBr, cm<sup>-1</sup>): ν 2935.81, 1651.77, 1519.63, 1495.53, 960.06. melting point: 42-43 °C.

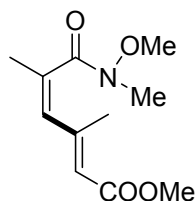

(2*E*, 4*Z*)-Methyl 6-(methoxy(methyl)amino)-3,5-dimethyl-6-oxohexa-2,4-dienoate (**3u**): This compound was prepared by the general procedure described above and was obtained as an orange oil. Yield = 78 %. <sup>1</sup>H NMR (500 MHz, CDCl<sub>3</sub>): δ 5.95 (s, 1H), 5.80 (s, 1H), 3.69 (s, 3H), 3.63 (s, 3H), 3.23 (s, 3H), 2.25 (s, 3H), 2.06 (s, 3H). <sup>13</sup>C NMR (125 MHz, CDCl<sub>3</sub>): δ 172.0, 167.2, 151.8, 136.5, 131.3, 119.1, 61.6, 51.1, 32.4, 22.3, 16.0. HR-MS (ESI): Calculated for C<sub>11</sub>H<sub>17</sub>NO<sub>4</sub>: [M+H]<sup>+</sup> 214.1082. Found: *m/z* 214.1082. FTIR (KBr, cm<sup>-1</sup>): ν 2948.84, 2358.22, 1715.85, 1675.15, 1434.98, 1381.73, 1360.88, 1244.18, 1161.33, 997.15

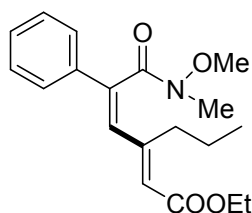

(2*E*, 4*Z*)-Ethyl 6-(methoxy(methyl)amino)-5-phenyl-3-propyl-6-oxohexa-2,4-dienoate (**3v**): This compound was prepared by the general procedure described above and was obtained as an orange oil, yield = 65 %. <sup>1</sup>H NMR (500 MHz, CDCl<sub>3</sub>): δ 7.48-7.34 (m, 5H), 6.40 (s, 1H), 5.96 (s, 1H), 4.16 (q, *J* = 7.0 Hz, 2H), 3.28 (s, 3H), 3.26 (s, 3H), 2.73 (t, *J* = 8.0, 2H), 1.61-1.53 (m, 2H), 1.27 (t, *J* = 7.0 Hz, 3H), 0.98 (t, *J* = 7.5 Hz, 3H). <sup>13</sup>C NMR (125 MHz, CDCl<sub>3</sub>): δ 170.7, 166.4, 156.3, 139.5, 136.9, 129.9, 128.8, 128.6, 126.4, 118.6, 61.2, 59.8, 33.5, 32.5, 22.3, 14.3, 14.2. HR-MS (ESI): Calculated for C<sub>14</sub>H<sub>23</sub>NO<sub>4</sub>: [M+H]<sup>+</sup> 332.1856. Found: *m/z* 332.1859. FTIR (KBr, cm<sup>-1</sup>): ν 2964.33, 1713.30, 1652.03, 1372.84, 1265.24, 1150.06, 1035.11, 695.10.

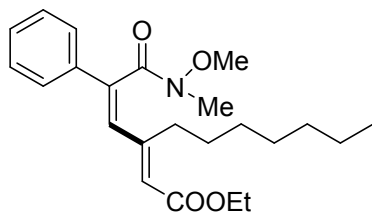

**(E)-ethyl 3-((Z)-3-(methoxy(methyl)amino)-3-oxo-2-phenylprop-1-en-1-yl)dec-2-enoate (3w)**

This compound was prepared by the general procedure described above and was obtained as an orange oil, yield = 46 %. <sup>1</sup>H NMR (500 MHz, CDCl<sub>3</sub>) δ 7.46 – 7.23 (m, 5H), 6.33 (s, 1H), 5.87 (s, 1H), 4.11-4.06 (m, 2H), 3.21 (s, 3H), 3.19 (s, 3H), 2.69 – 2.63 (m, 2H), 1.50 – 1.39 (m, 2H), 1.33 – 1.14 (m, 11H), 0.80 (t, *J* = 6.8 Hz, 3H). <sup>13</sup>C NMR (125 MHz, CDCl<sub>3</sub>): δ 170.7, 166.4, 156.5, 139.4, 136.9, 129.9, 129.1, 128.8, 126.4, 118.3, 61.3, 59.8, 32.5, 31.87, 31.8, 29.9, 29.2, 29.0, 22.7, 14.3, 14.1. HR-MS (ESI): Calculated for C<sub>23</sub>H<sub>33</sub>NO<sub>4</sub>: [M+H]<sup>+</sup> 388.2482. Found: *m/z* 388.2478. FTIR (KBr, cm<sup>-1</sup>): ν 2926.95, 1659.01, 1626.68, 1446.67, 1151.09, 1044.45, 695.11.

**Gram-scaled synthesis**

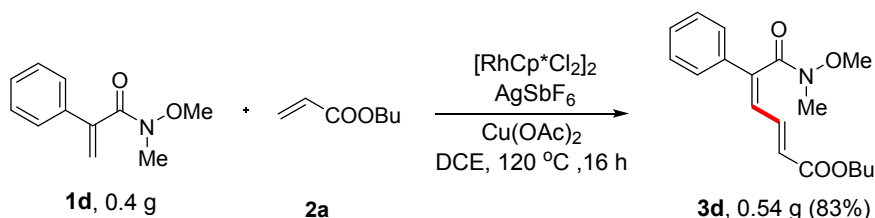

*N*-Methoxy-*N*-methyl-2-phenylacrylamide (2.1 g, 11.0 mmol, 1.0 equiv), [RhCp\*Cl<sub>2</sub>]<sub>2</sub> (34 mg, 0.055 mmol, 0.5 mol%), AgSbF<sub>6</sub> (0.22 mmol, 2.0 mol%), Cu(OAc)<sub>2</sub> (4.4 g, 22.0 mmol, 2.0 equiv), were charged into an oven-dried 100 mL sealed tube. The tube was evacuated and refilled with Ar. After addition of butyl acrylate (3.16 mL, 22.0 mmol, 2.0 equiv) and DCE (30 mL), the sealed tube was heated to 120°C with stirring for 48 hours. After cooling down, the mixture was diluted with DCM, filtrated and concentrated in vacuo. The resulting residue was directly purified by column chromatography to give product as yellow oil (2.8 g, 82%).

**Selective reduction**

**Synthesis of 4q**

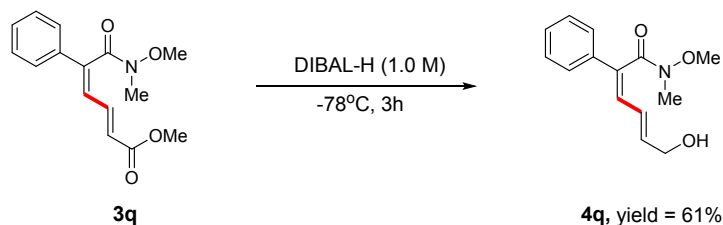

To a solution of the butadiene **3q** (27.5 mg, 0.1 mmol, 1.0 equiv) in anhydrous THF (1 mL) at -78 °C was added DIBAL-H (1.0 M in heptane, 0.3 mL, 0.3 mmol) carefully over 5 min. The resulting solution was stirred at -78 °C for 1 h and quenched with saturated aqueous NH<sub>4</sub>Cl (0.1 mL). The mixture was warmed to ambient temperature. The layer was separated and extracted with ethyl

acetate (5 mL  $\times$  3). The combined organic layers were washed with brine and dried over anhydrous  $\text{Na}_2\text{SO}_4$ . Concentration in vacuo and purification by column chromatography afforded the alcohol **4q** (15 mg, 61%) as a yellow oil, and the unreacted acrylamide **1d** was recovered (25%).  $^1\text{H}$  NMR (400 MHz,  $\text{CDCl}_3$ )  $\delta$  = 7.26-7.39 (m, 5H), 6.65 (d,  $J$  = 11.5 Hz, 1H), 6.45 (dd,  $J$  = 14.0 Hz, 12.0 Hz, 1H), 6.06-6.13 (m, 1H), 4.26 (d,  $J$  = 5.0 Hz, 2H), 3.90 (s, 1H), 3.40 (s, 2H), 3.34 (s, 2H), 3.12 (s, 1H), 1.70 (brs, 1H).  $^{13}\text{C}$  NMR (125 MHz,  $\text{CDCl}_3$ )  $\delta$  = 170.2, 137.7, 136.3, 136.2, 129.0, 128.7, 128.0, 127.3, 125.6, 125.5, 63.2, 61.6, 32.2. FTIR (KBr,  $\text{cm}^{-1}$ ):  $\nu$  3851.14, 3673.62, 3626.76, 3417.43, 2932.41, 1644.68, 1446.35, 1385.56, 1102.77, 1006.29, 694.16, 495.65. HR-MS (ESI): Calculated for  $\text{C}_{14}\text{H}_{17}\text{NO}_3$ :  $[\text{M}+\text{H}]^+$  248.1281, Found:  $m/z$  248.1273.

### Synthesis of **4p**

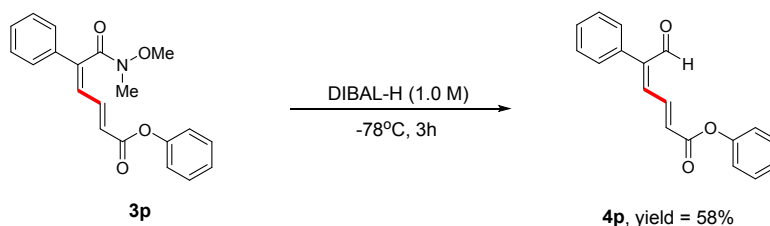

To a solution of the butadiene **3p** (33.7 mg, 0.1 mmol, 1.0 equiv) in anhydrous THF (1 mL) at -78  $^\circ\text{C}$  was added DIBAL-H (1.0 M in heptane, 0.3 mL, 0.3 mmol, 3.0 equiv) carefully over 20 min. The resulting solution was stirred at -78  $^\circ\text{C}$  for 2 h and quenched with saturated aqueous  $\text{NH}_4\text{Cl}$  (0.1 mL). The mixture was warmed to ambient temperature. The layer was separated and extracted with ethyl acetate (5 mL  $\times$  3). The combined organic layers were washed with brine and dried over anhydrous  $\text{Na}_2\text{SO}_4$ . Concentration in vacuum and purification by column chromatography afforded the aldehyde **4p** in 58% yield as yellow solid, and the unreacted acrylamide **1d** was recovered (about 30%).  $^1\text{H}$  NMR (500 MHz,  $\text{CDCl}_3$ )  $\delta$  = 10.50 (s, 1H), 8.43 (dd,  $J$  = 12.5 Hz, 15.0 Hz, 1H), 7.16-7.45 (m, 11H), 6.45 (d,  $J$  = 15.0 Hz, 1H).  $^{13}\text{C}$  NMR (125 MHz,  $\text{CDCl}_3$ )  $\delta$  = 190.1, 161.3, 150.6, 143.2, 139.3, 138.3, 135.4, 129.5, 129.3, 128.7, 128.4, 128.3, 126.1, 121.5. FTIR (KBr,  $\text{cm}^{-1}$ ):  $\nu$  3851.05, 3708.76, 3667.67, 3626.70, 3564.67, 1732.23, 1682.42, 1651.67, 1538.57, 1505.36, 499.88. HR-MS (ESI): Calculated for  $\text{C}_{18}\text{H}_{14}\text{O}_3$ :  $[\text{M}+\text{H}]^+$  279.1016, Found:  $m/z$  279.1023. Melting point: 100-101  $^\circ\text{C}$ .

### Synthesis of **4r**

Carboxylic acid **3x** was obtained as a white solid in 95% yield from ester **3q** by hydrolysis using  $\text{LiOH}$  (aq.) as the base according to reported method.<sup>8d-e</sup> Melting point: 147  $^\circ\text{C}$ .  $^1\text{H}$  NMR (500 MHz,  $\text{CDCl}_3$ )  $\delta$  7.53 (dd,  $J$  = 15.1, 11.9 Hz, 1H), 7.49-7.36 (m, 5H), 6.76 (d,  $J$  = 11.8 Hz, 1H), 6.09 (d,  $J$  = 15.0 Hz, 1H), 3.42 (s, 3H), 3.39 (s, 3H).  $^{13}\text{C}$  NMR (125 MHz,  $\text{CDCl}_3$ )  $\delta$  171.5, 169.0, 145.9, 142.3, 135.0, 129.5, 128.9, 126.2, 124.2, 123.1, 61.7, 32.3. FTIR (KBr,  $\text{cm}^{-1}$ ):  $\nu$  3756.99, 3667.89, 2934.78, 2358.55, 2339.32, 1651.63, 1621.68, 1386.07, 1288.40, 980.05. HR-MS (ESI): Calculated for  $\text{C}_{14}\text{H}_{15}\text{NO}_4$ :  $[\text{M}+\text{H}]^+$  262.1074, Found:  $m/z$  262.1076.

To a solution of acid **3x** (26.1 mg, 0.1 mmol, 1.0 equiv) in anhydrous THF (1 mL) was added DIBAL-H (1.5 M in toluene, 0.2 mL, 0.3 mmol, 3.0 equiv) carefully over 20 min at -78  $^\circ\text{C}$ . The resulting solution was stirred at -78  $^\circ\text{C}$  for 2 h and quenched with saturated aqueous  $\text{NH}_4\text{Cl}$  (0.1 mL). The mixture was warmed to ambient temperature and was extracted with ethyl acetate (5 mL

× 3). The combined organic layers were washed with brine and dried over anhydrous Na<sub>2</sub>SO<sub>4</sub>. Concentration in vacuum and purification by column chromatography afforded the aldehyde **4r** in 68% yield as a yellow solid. Melting point: 94.5°C. <sup>1</sup>H NMR (500 MHz, CDCl<sub>3</sub>) δ 10.41 (s, 1H), 8.28 (dd, *J* = 15.1, 12.3 Hz, 1H), 7.40-7.30 (m, 5H), 7.07 (d, *J* = 12.3 Hz, 1H), 6.19 (d, *J* = 15.0 Hz, 1H). <sup>13</sup>C NMR (125 MHz, CDCl<sub>3</sub>) δ 190.2, 171.1, 143.4, 139.0, 139.0, 135.3, 129.3, 128.7, 128.3, 128.2. FTIR (KBr, cm<sup>-1</sup>): ν 3730.86, 3667.49, 1732.16, 1682.42, 1614.47, 1538.31, 1455.25, 1309.22. HR-MS (ESI): Calculated for C<sub>12</sub>H<sub>10</sub>O<sub>3</sub>: [M+H]<sup>+</sup> 203.0703, Found: *m/z* 203.0708.

### Deuterium Labeled Experiments

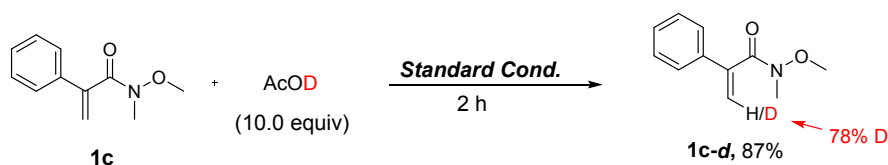

An oven-dried screw-cap vial was charged with [RhCp\*Cl<sub>2</sub>]<sub>2</sub> (2.5 mol%, 0.0025 mmol), AgSbF<sub>6</sub> (0.1 equiv., 0.02 mmol), Cu(OAc)<sub>2</sub> (2.0 equiv, 0.4 mmol), DCE (1 mL) and AcOD (10 equiv., 5.0 mmol). Then, acrylamides (0.2 mmol) was added into the solution. The vial was sealed under argon and heated to 120 °C with stirring for 2 hour. After cooling down, the mixture was directly applied to a flash column chromatography (EtOAc/petroleum ether mixtures) on silica gel (33.2 mg, 87% recovered). The D % of **1c-d** was estimated by <sup>1</sup>HNMR.

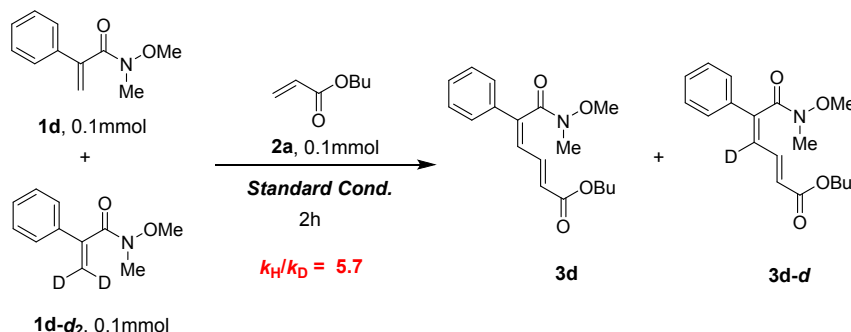

A 15 mL screw-cap vial was charged with [RhCp\*Cl<sub>2</sub>]<sub>2</sub> (3.1 mg, 0.005 mmol, 2.5 mol%), AgSbF<sub>6</sub> (6.8 mg, 0.02 mmol, 10 mol%) and DCE (1.0 mL). The *N*-methoxy- *N*-methyl-2-phenylacrylamide **1c** (19.1 mg, 0.1 mmol, 1.0 equiv) and **1c-d<sub>2</sub>** (19.3 mg, 0.1 mmol, 1.0 equiv.) were added into the solution in sequence. The vial was sealed under Ar and heated to 120 °C with stirring for 2 hours. After cooling down, the mixture was diluted with ethyl acetate, filtrated, concentrated in vacuo and purified by column chromatography affording the mixed products **3d** and **3d-d** (8.2 mg, 26%) as colorless oil, and a mixture of **1c/1c-d<sub>2</sub>** was recovered (29.5 mg, 77%). The ratio of **3d/3d-d** was determined by <sup>1</sup>H NMR to be 5.7:1.

## **References**

- [1] R. H. Munday, R. M. Denton, J. C. Anderson, *J. Org. Chem.* **2008**, *73*, 8033.
- [2] I. Fleming, D. Lee, *J. Chem. Soc. - Perk. Trans. I*, **1998**, 2701.
- [3] J. Z. Hamilton, N. T. Kadunce, M. D. McDonald, L. Rios, A. R. Matlin, *Tetrahedron Lett.* **2015**, *56*, 6622.
- [4] J. Zhang, T. P. Loh, *Chem. Commun.* **2012**, *48*, 11232.
- [5] X. H. Hu, J. Zhang, X. F. Yang, Y. H. Xu, T. P. Loh, *J. Am. Chem. Soc.* **2015**, *137*, 3169.

# <sup>1</sup>H, <sup>13</sup>C Spectra

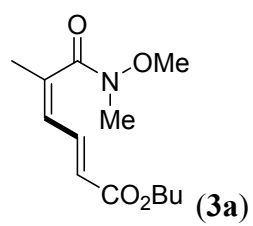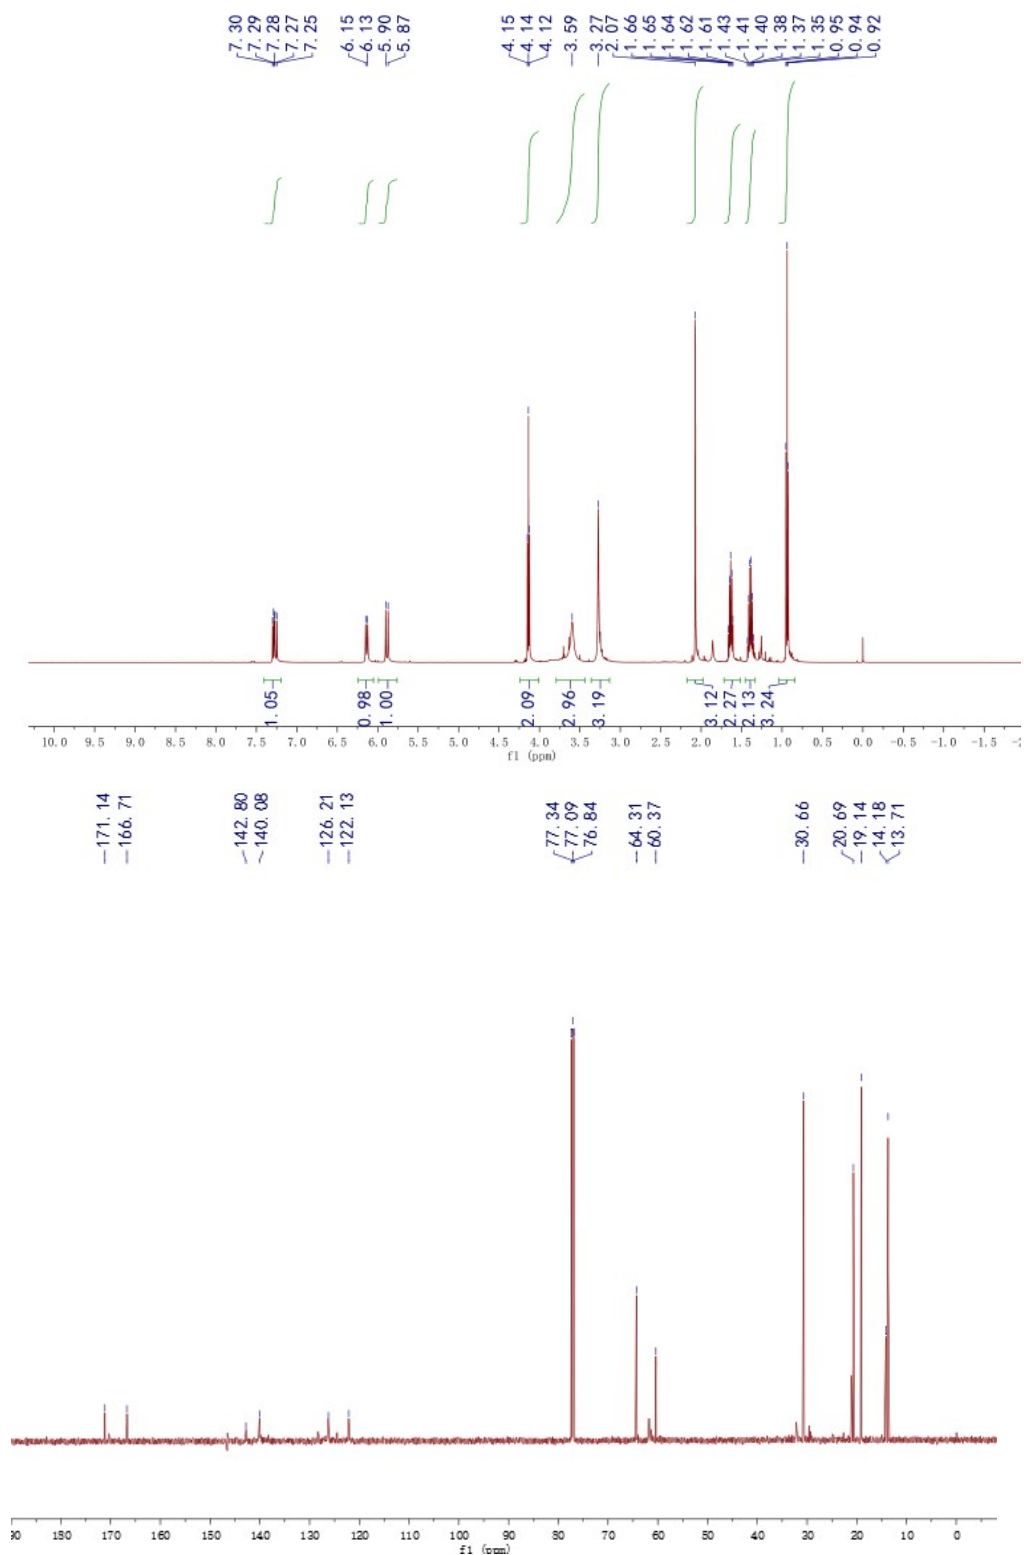

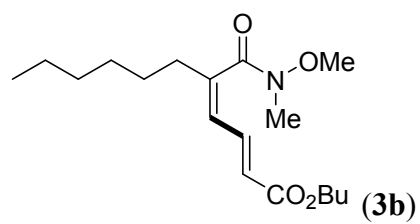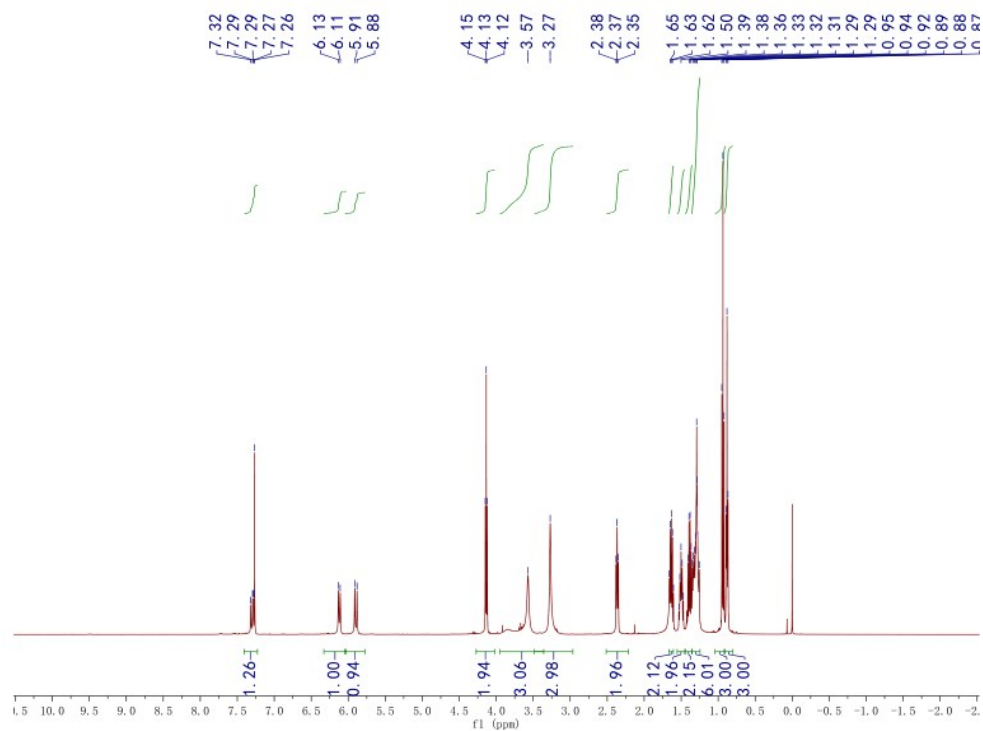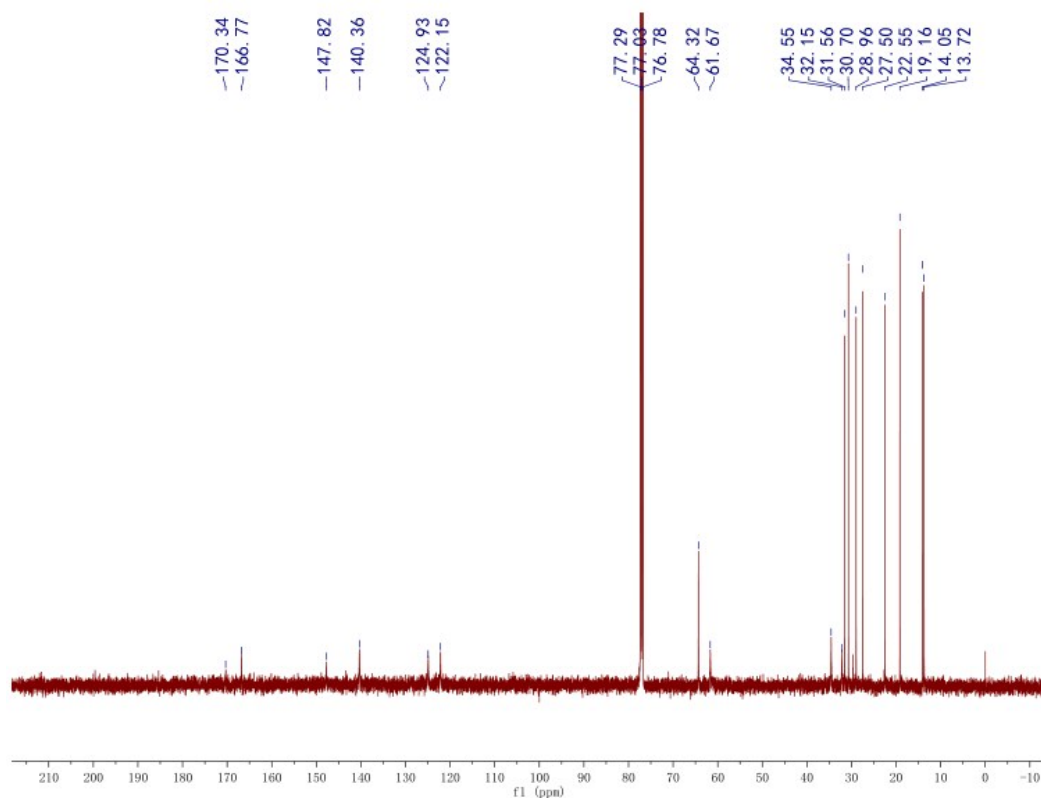

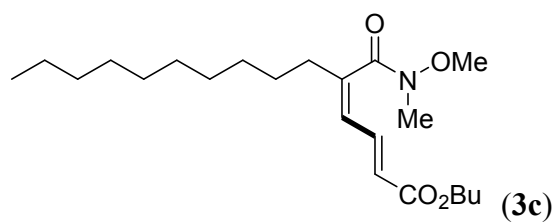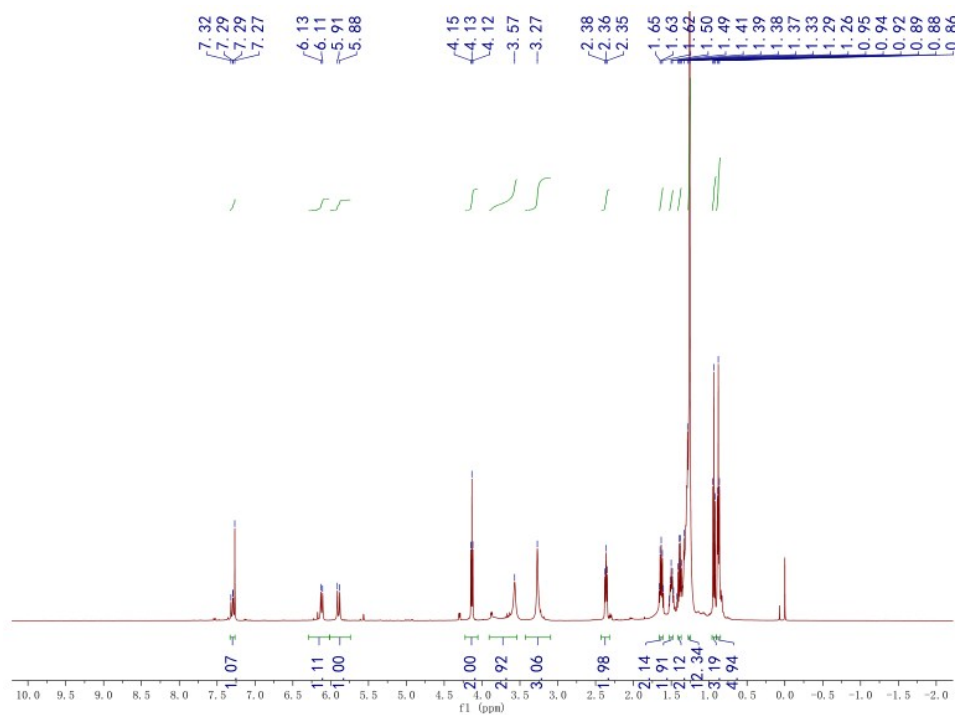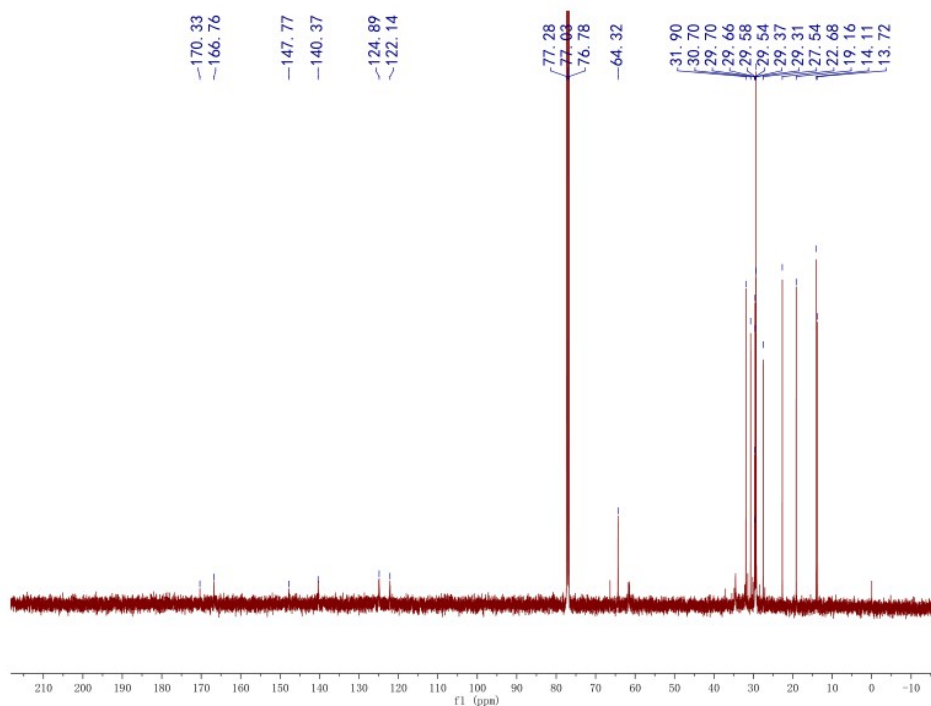



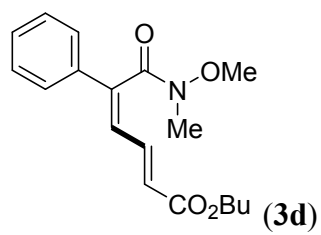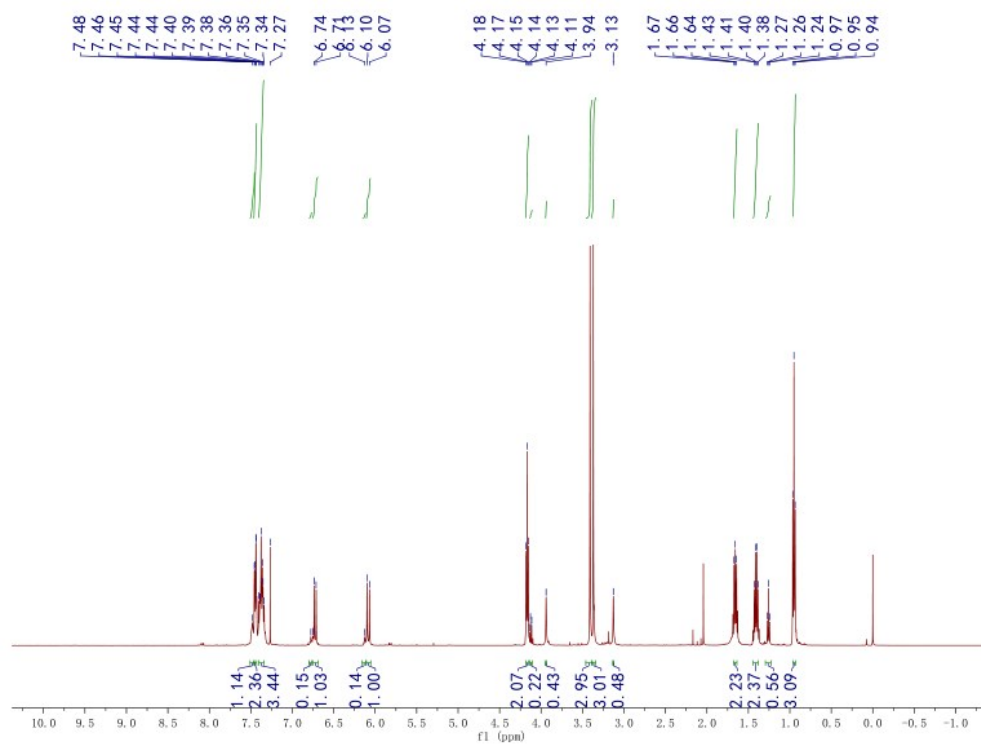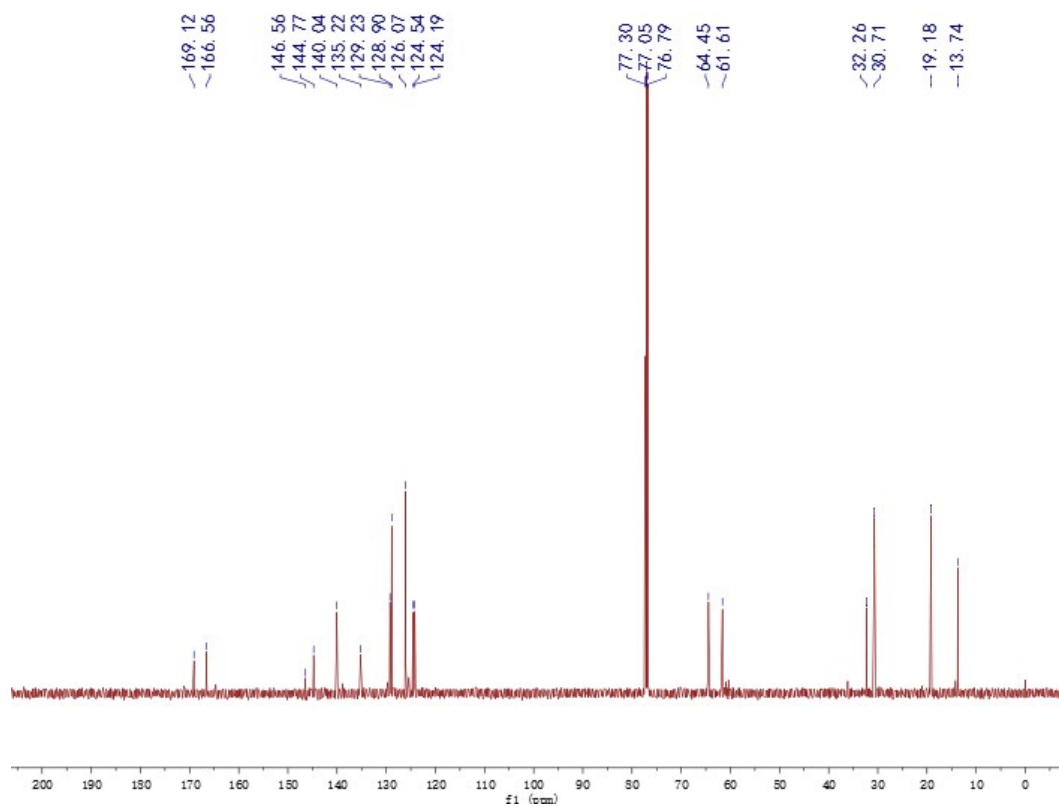

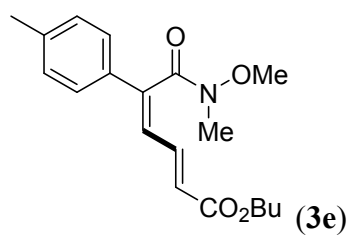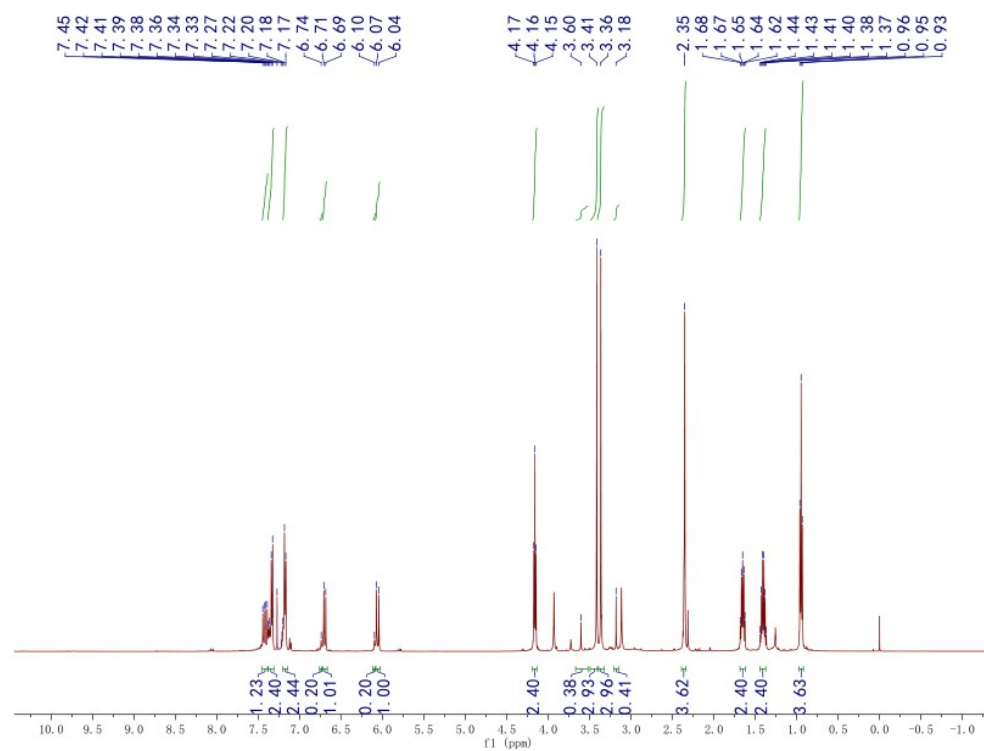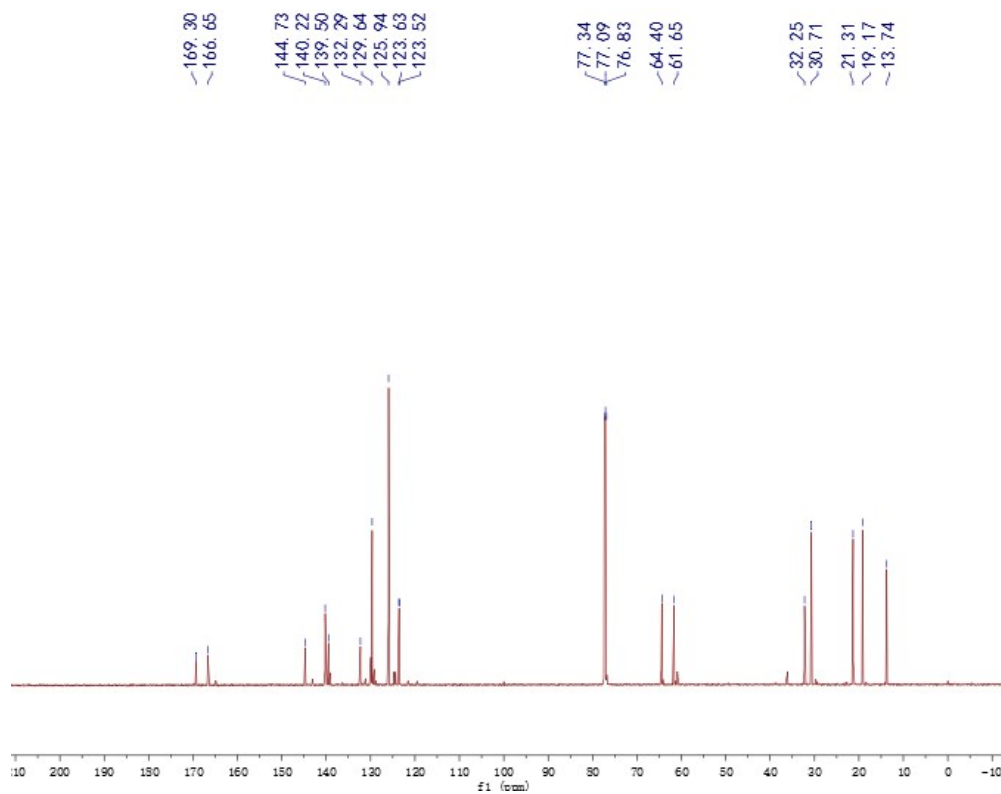

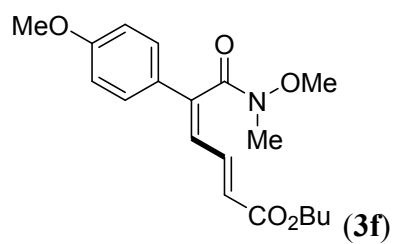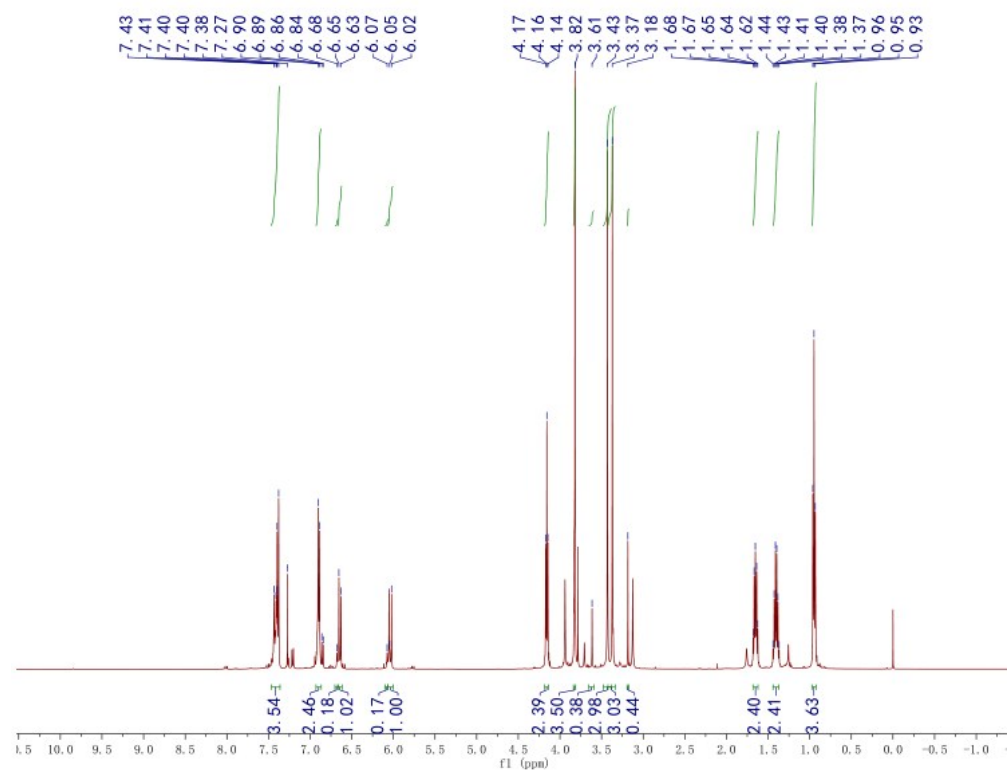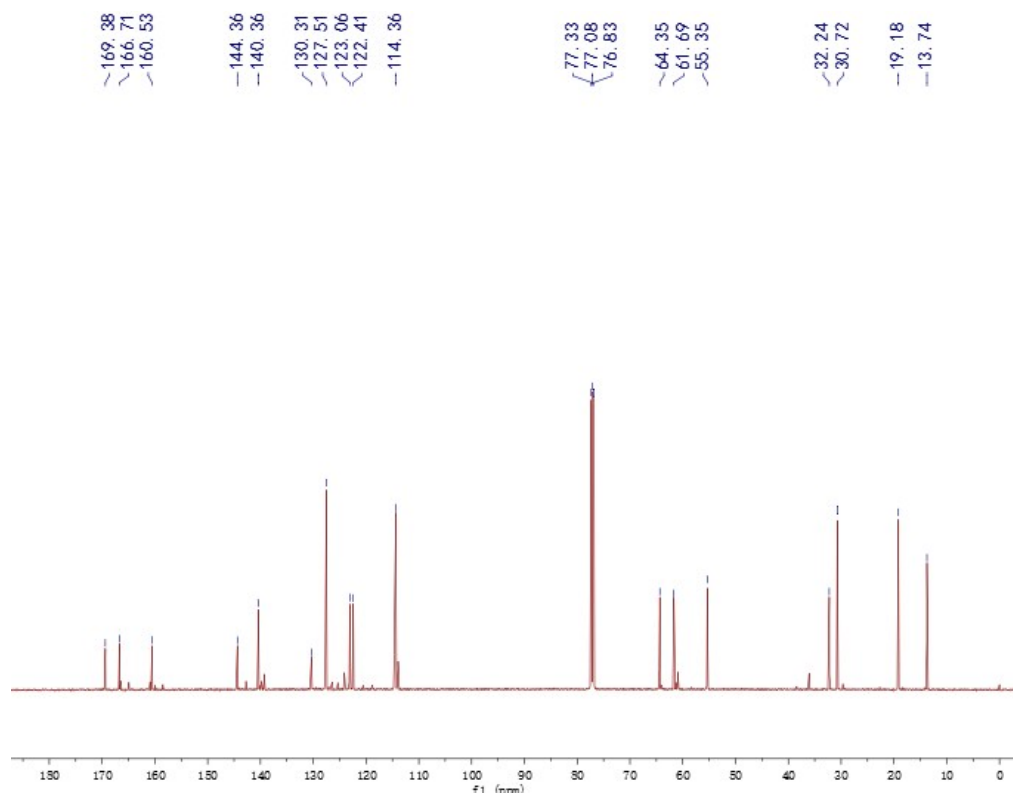

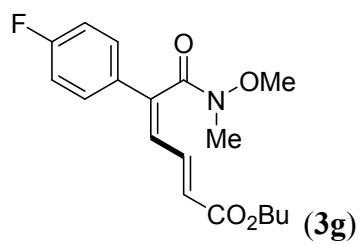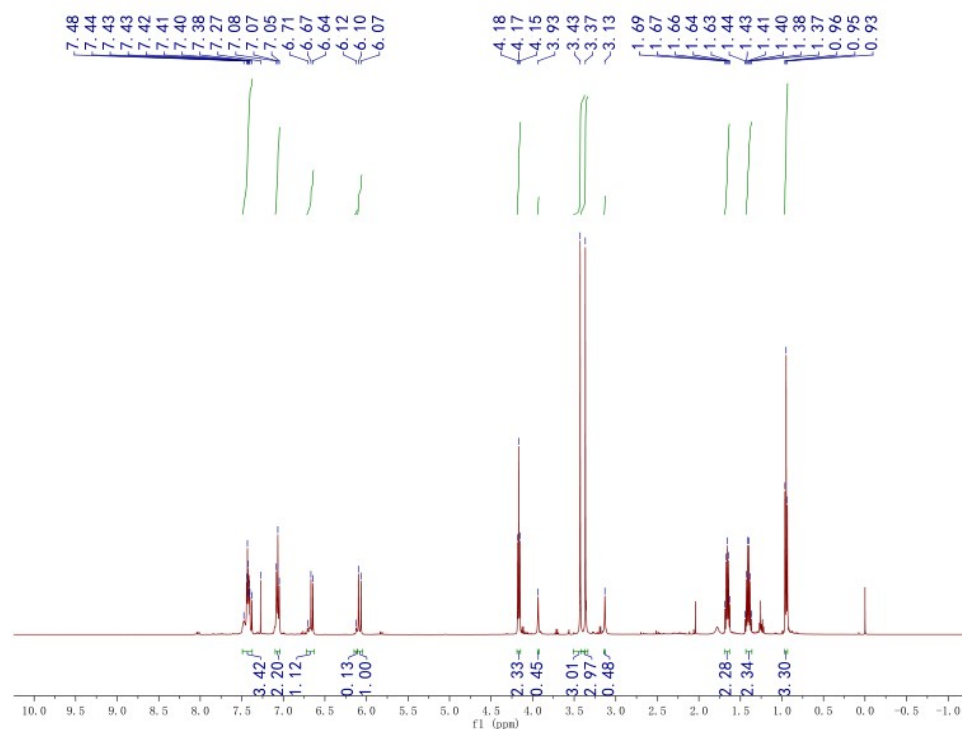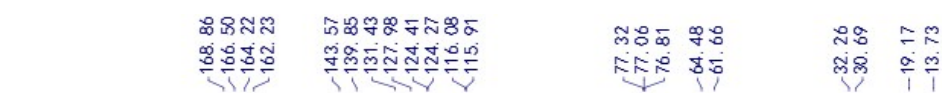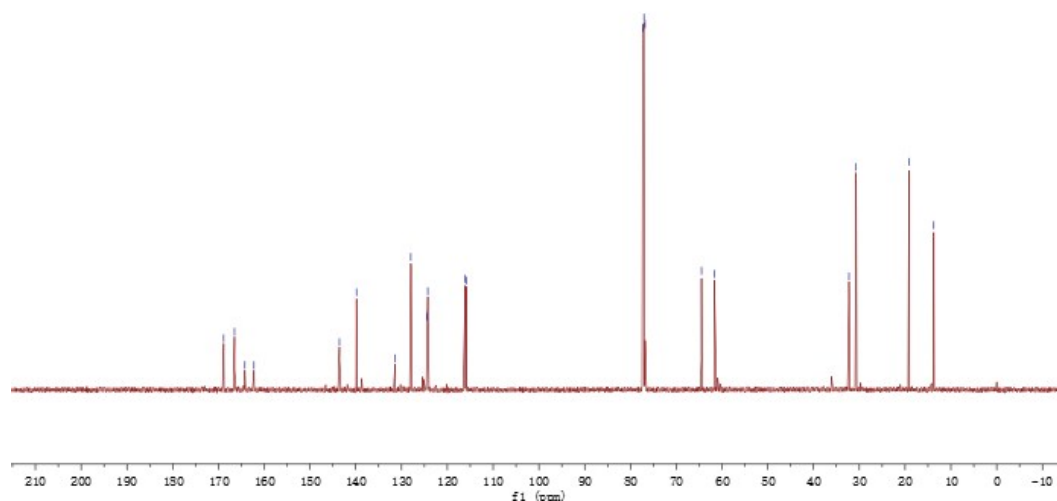

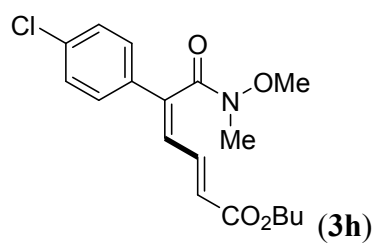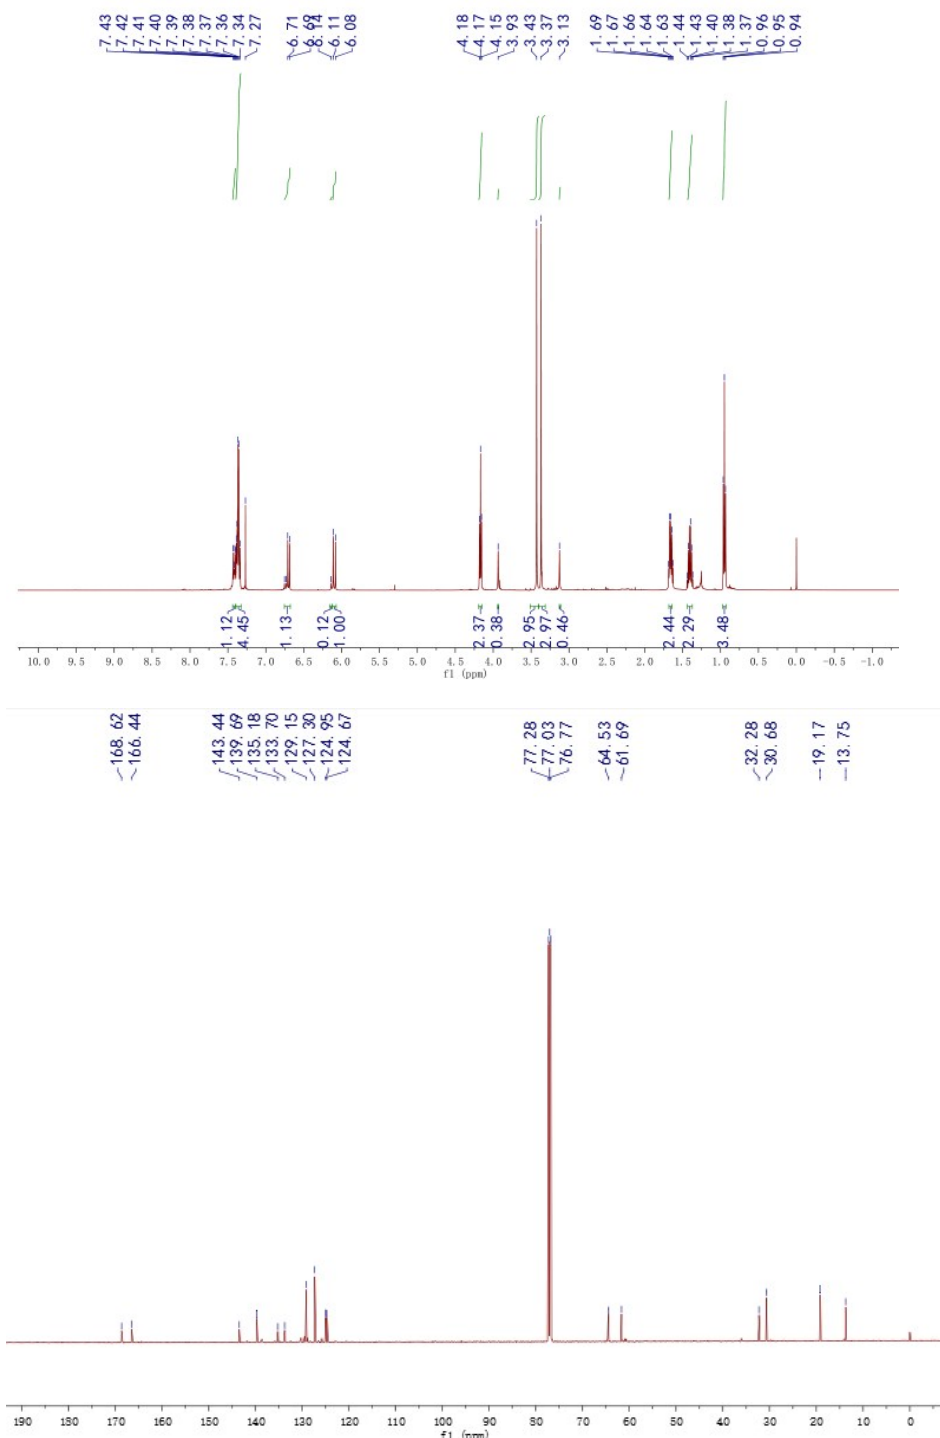

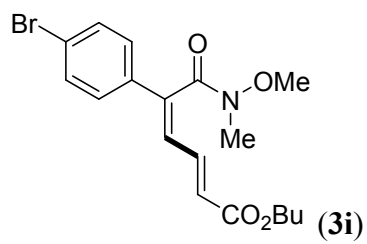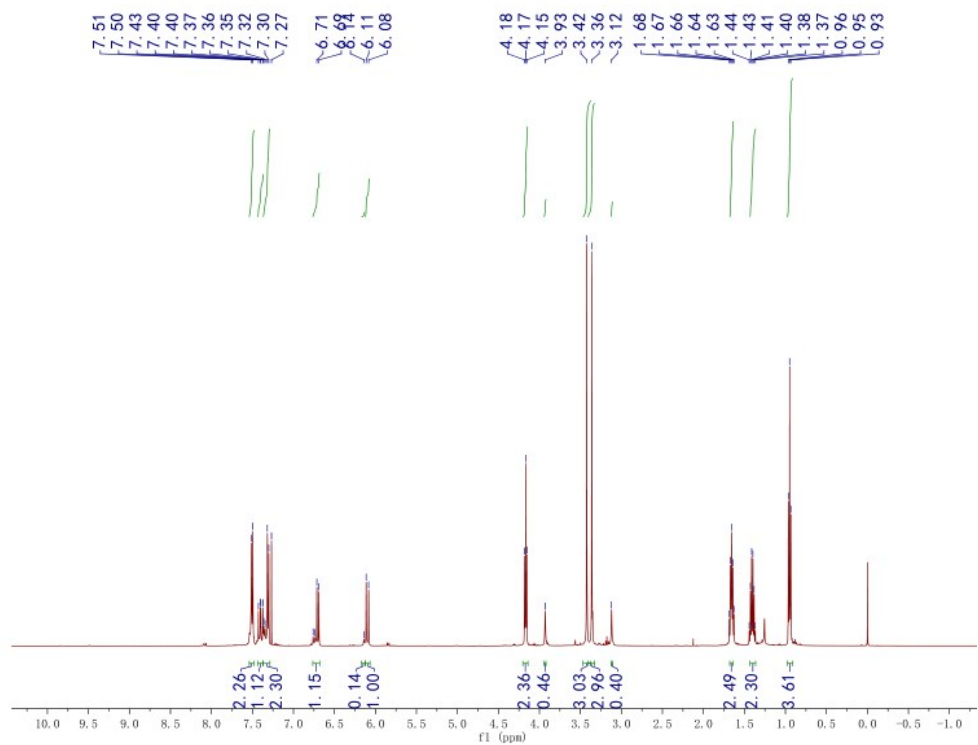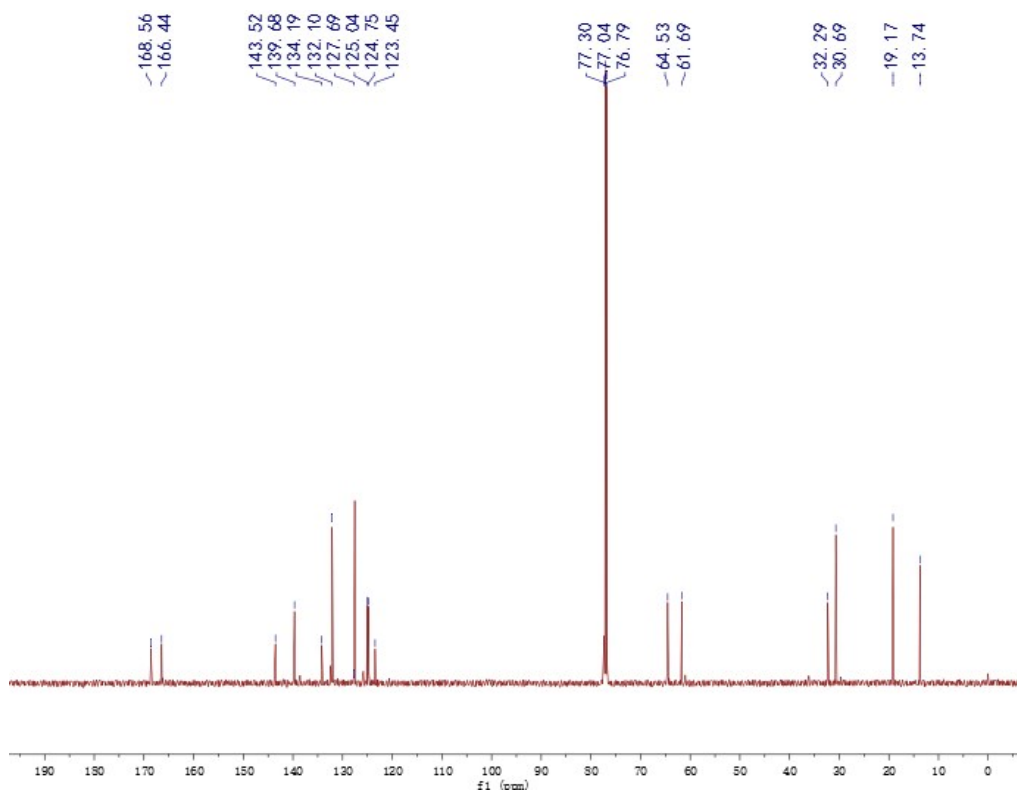

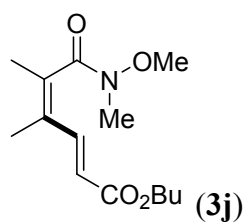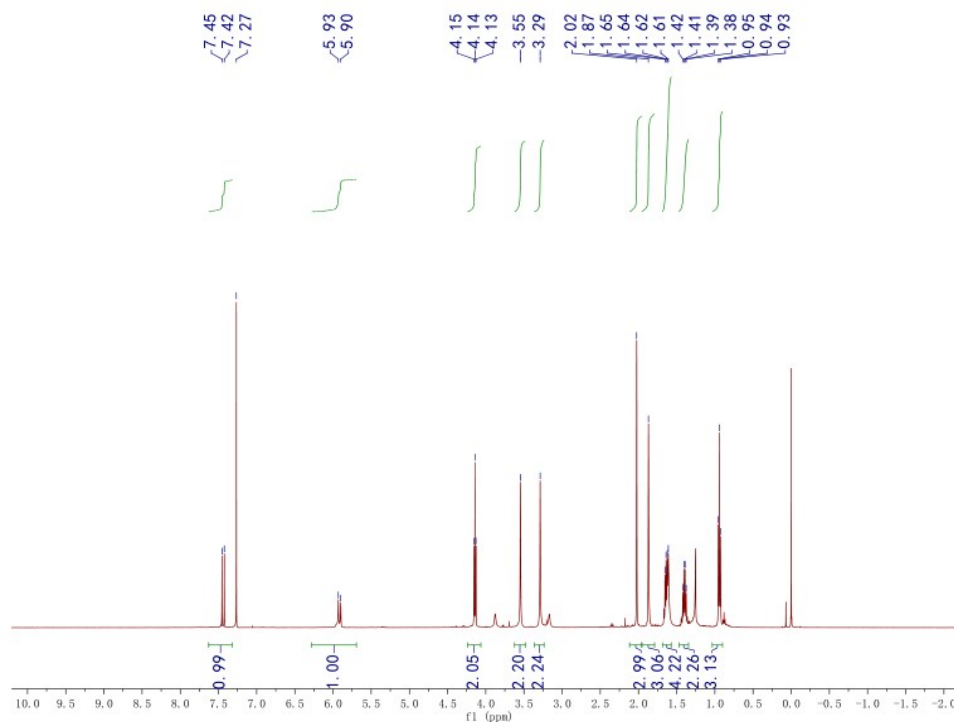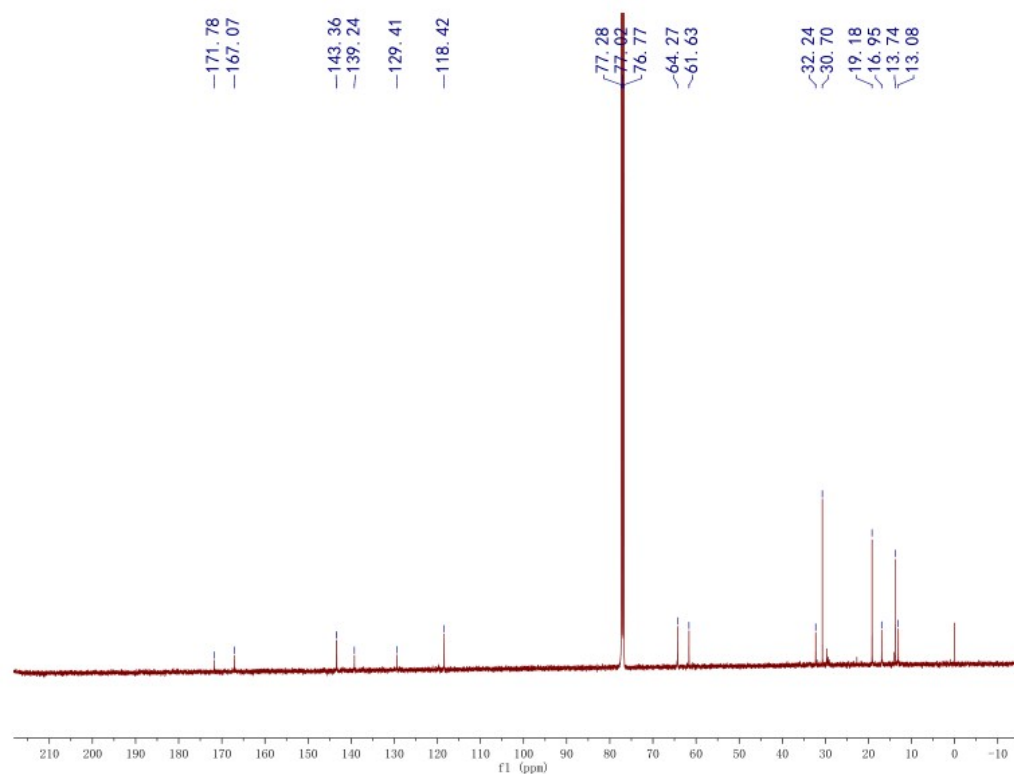

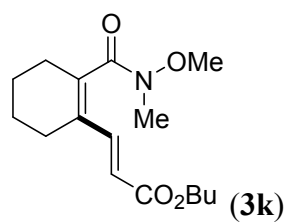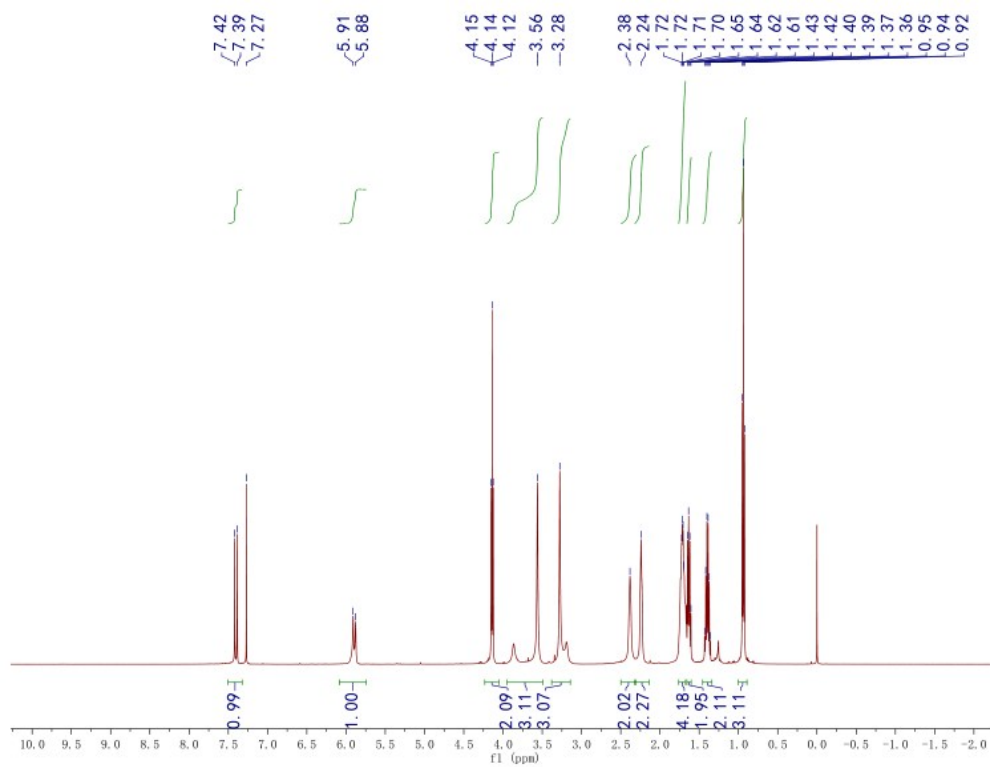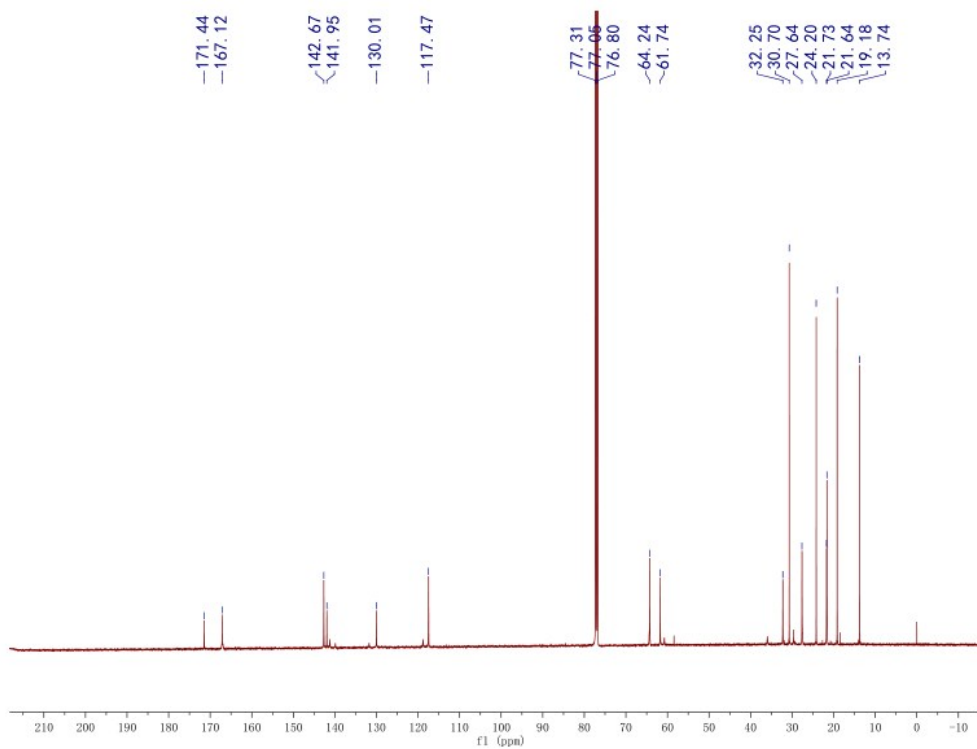



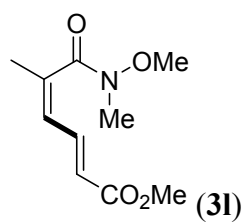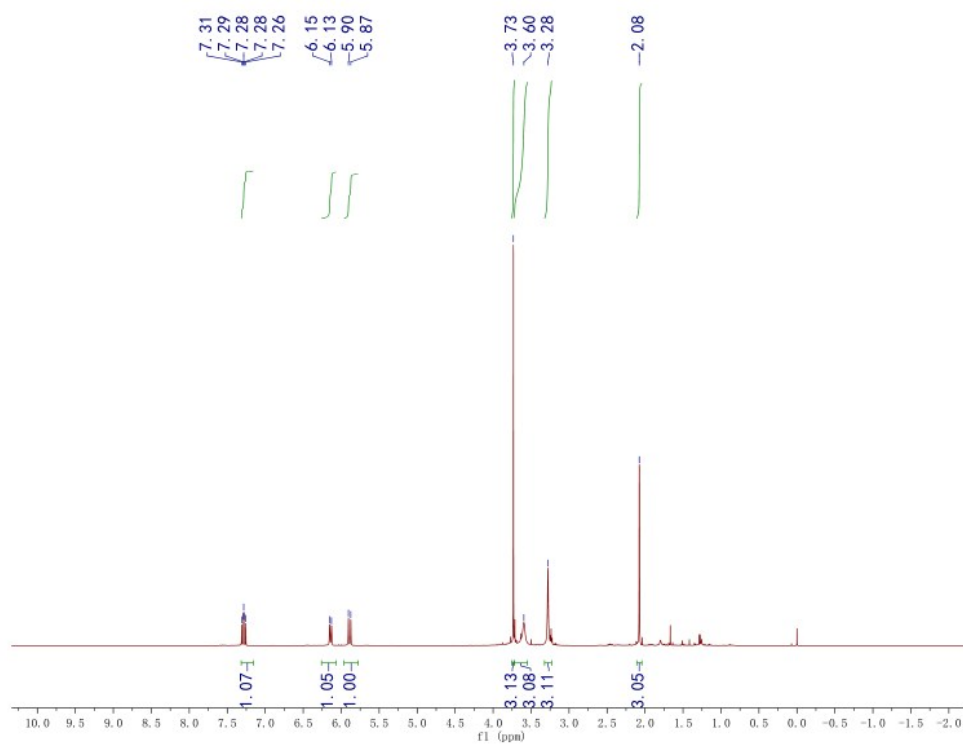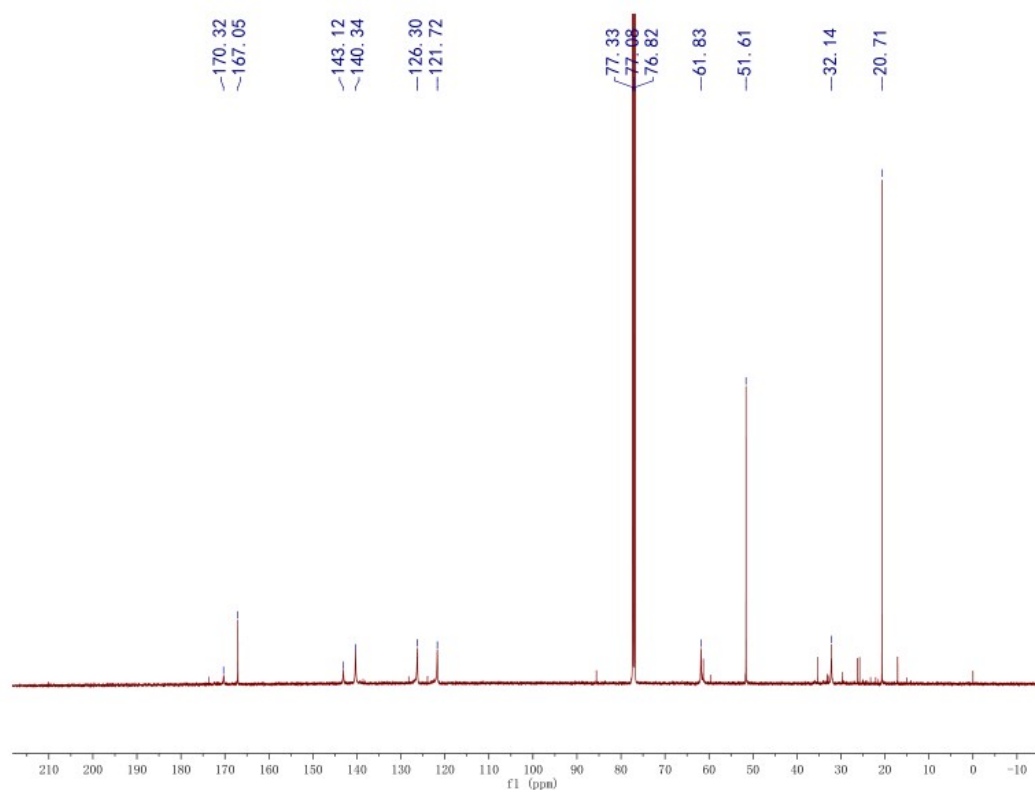

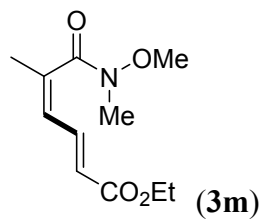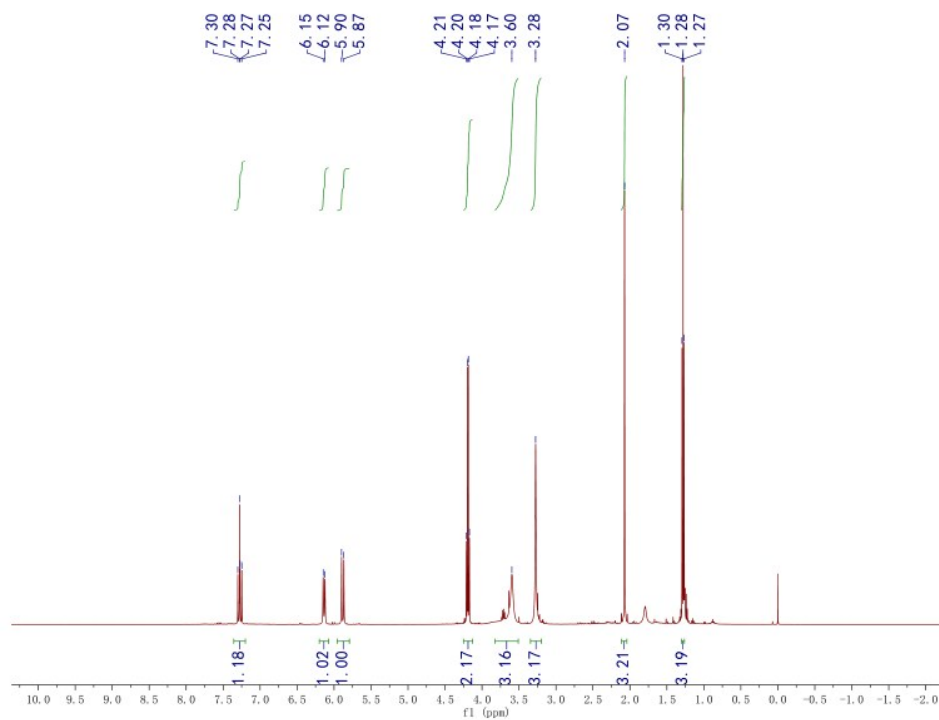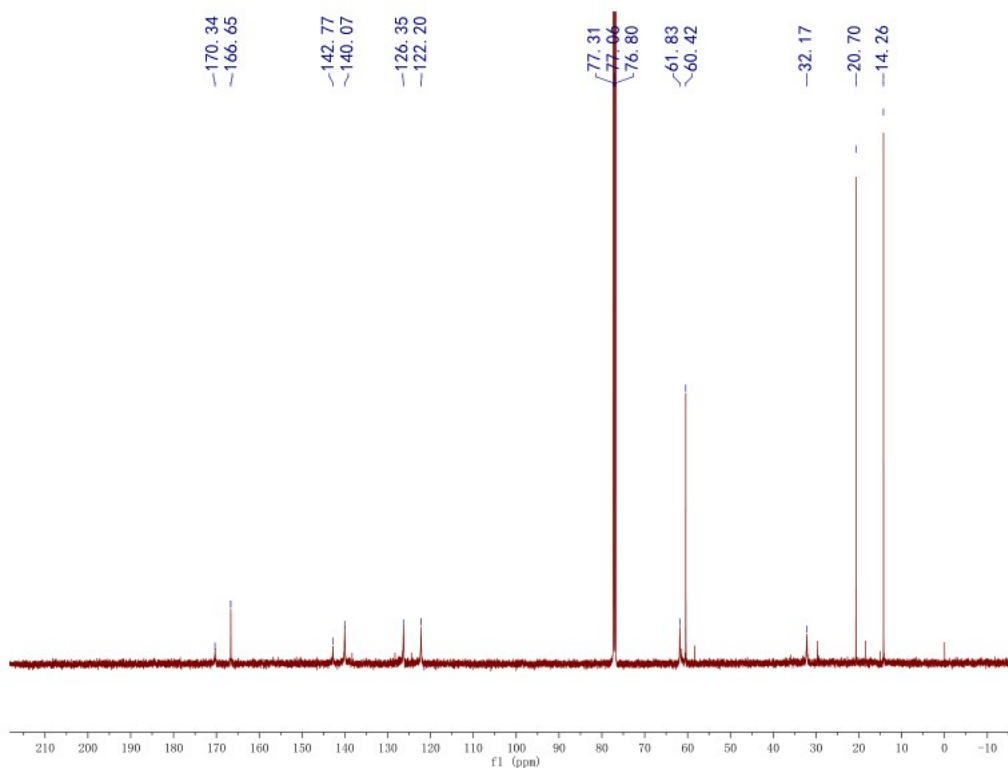

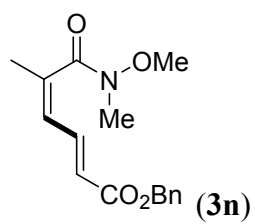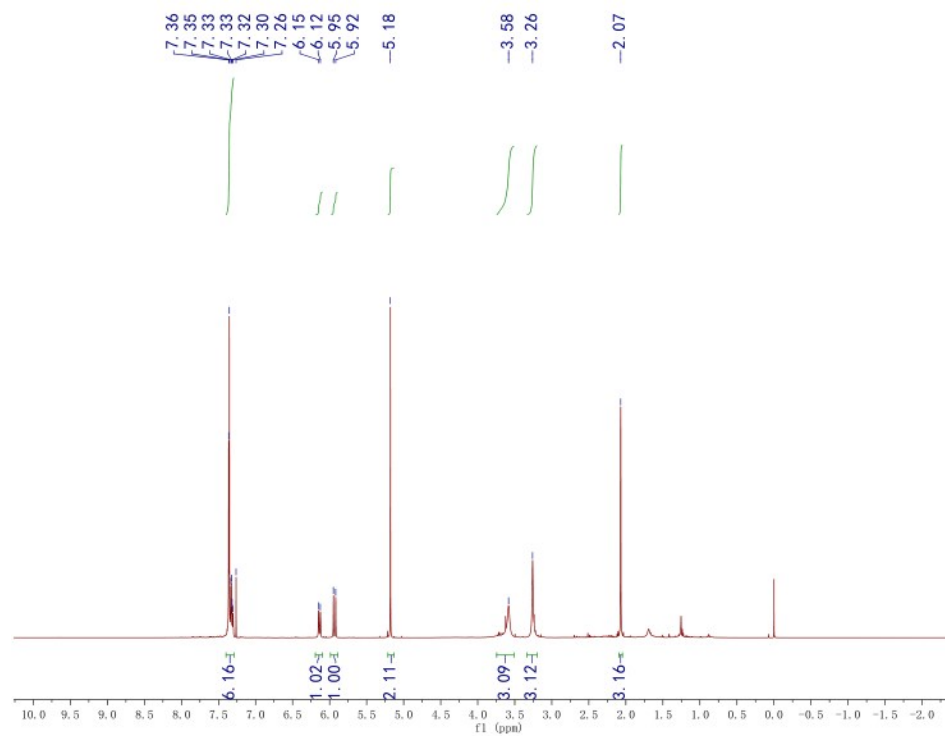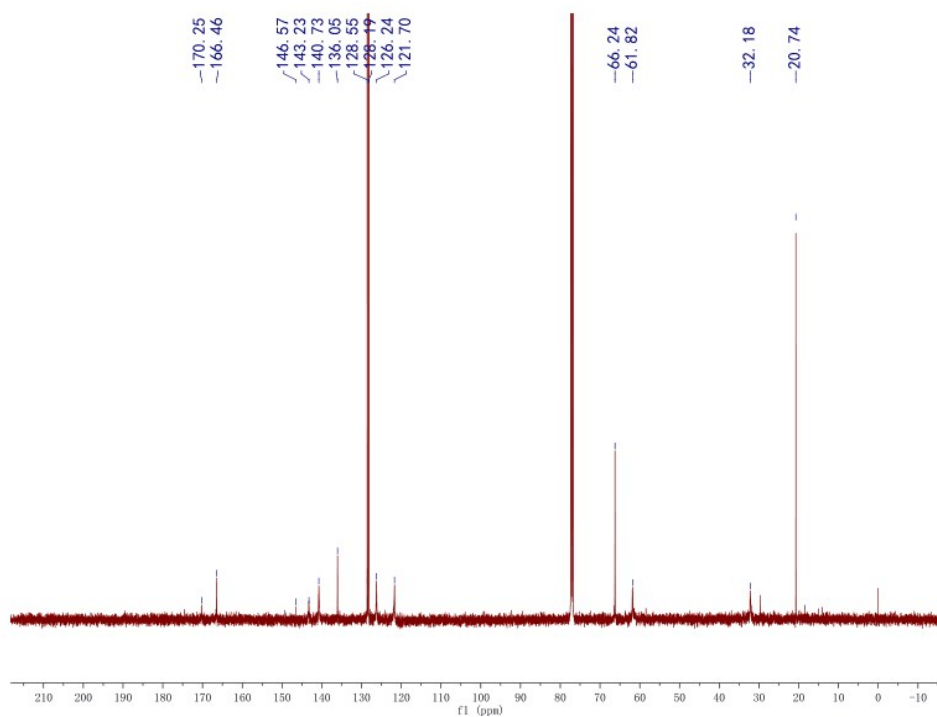

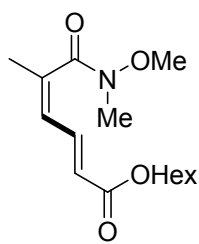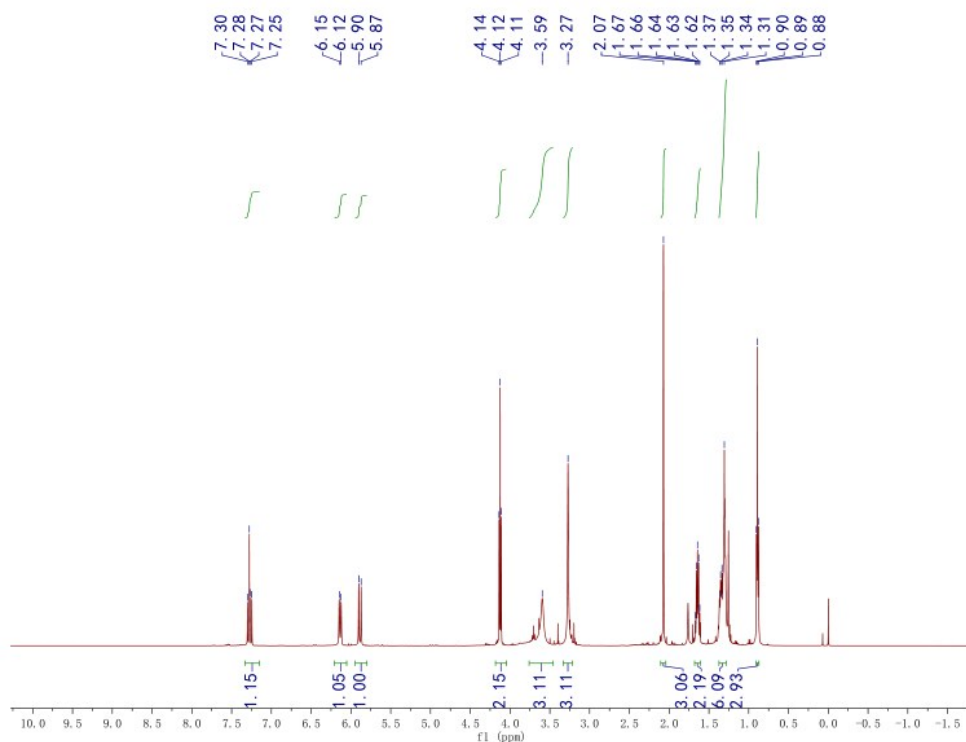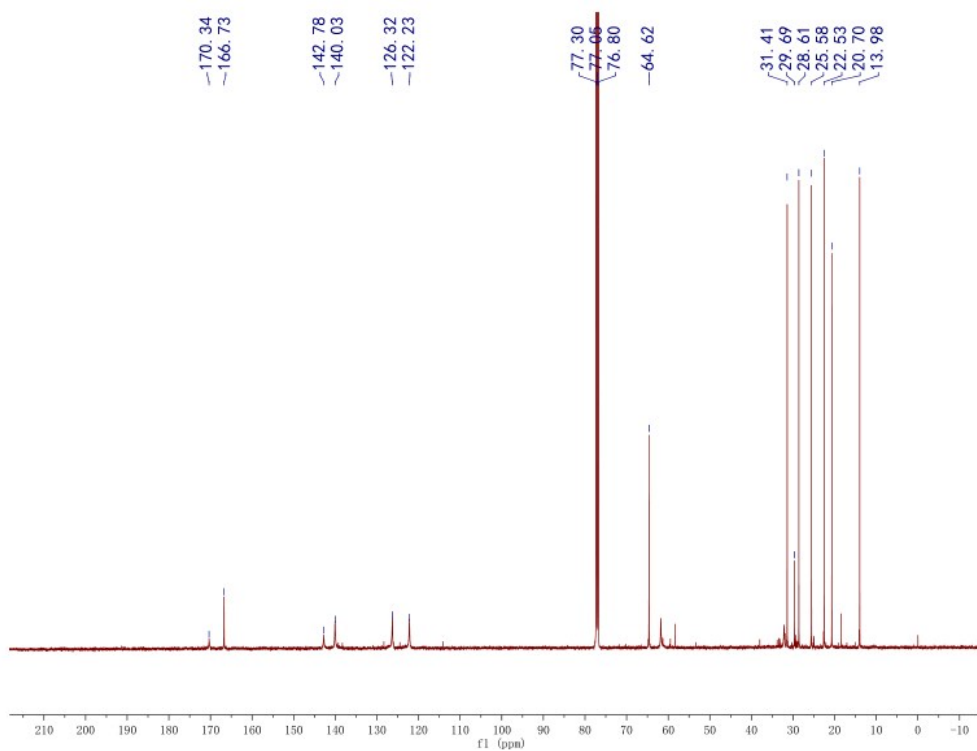

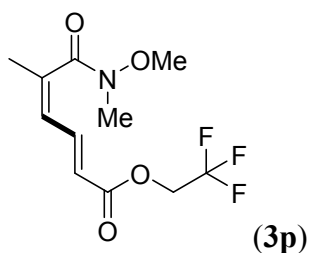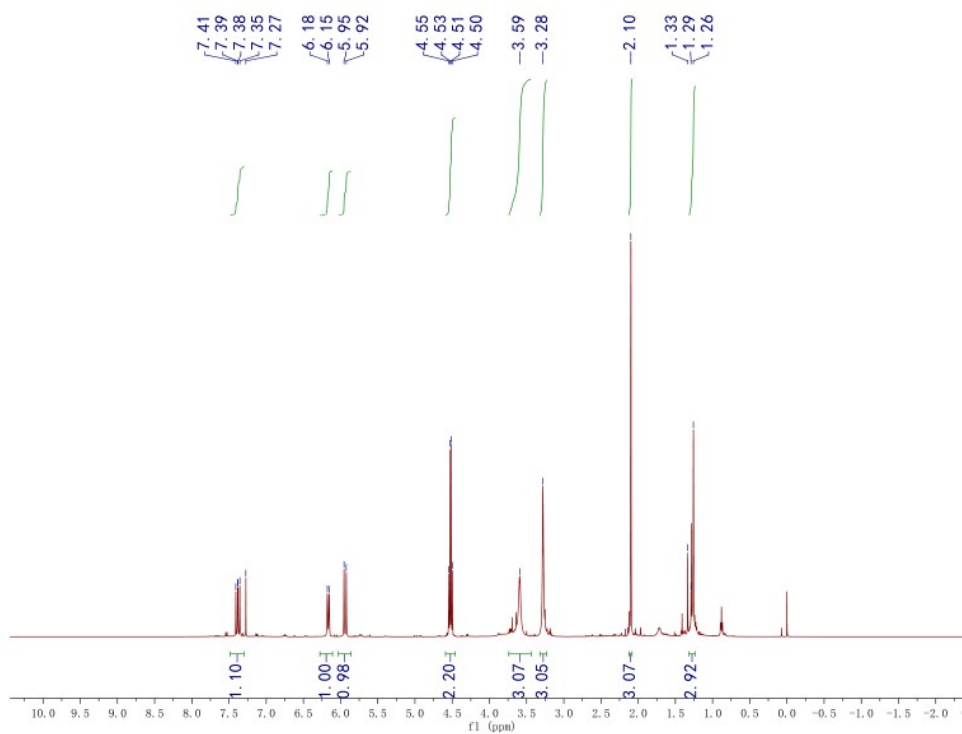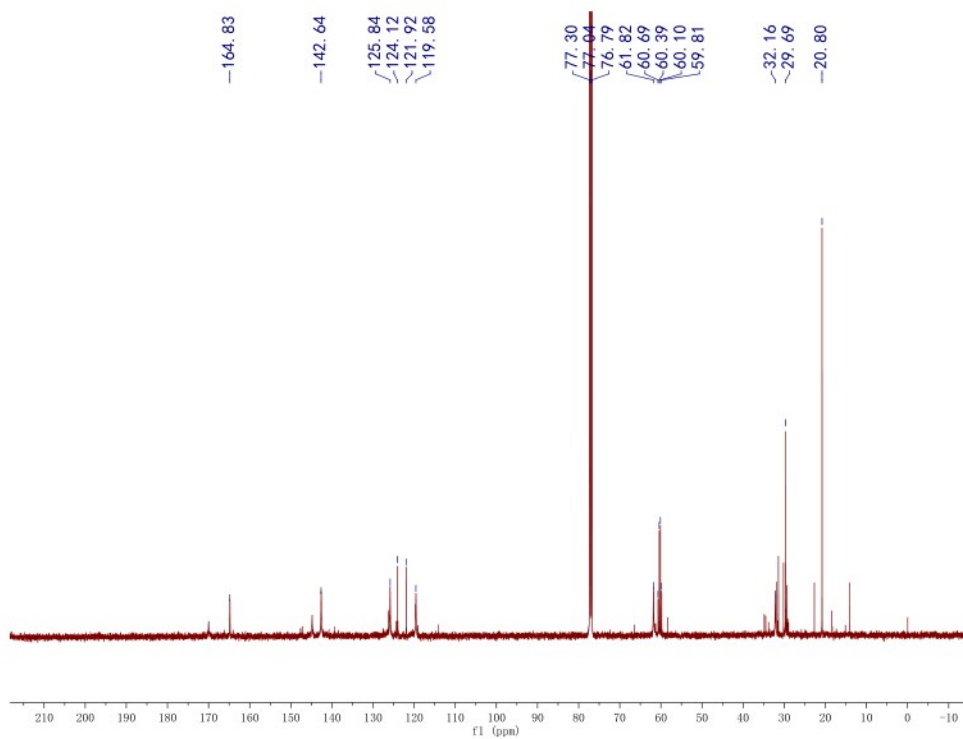

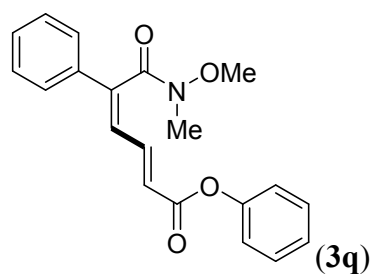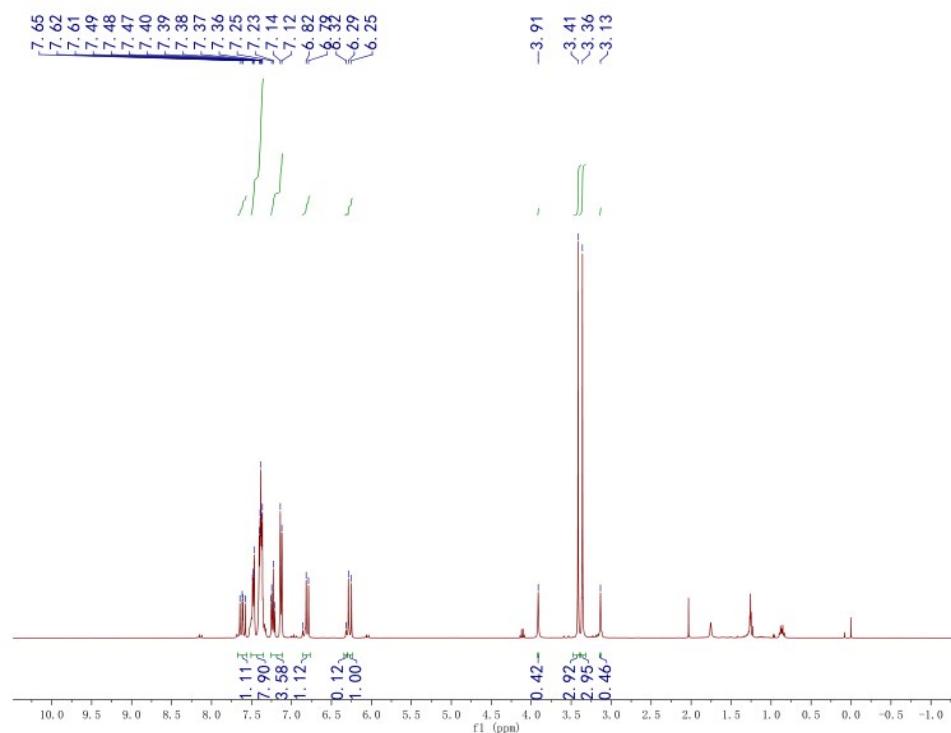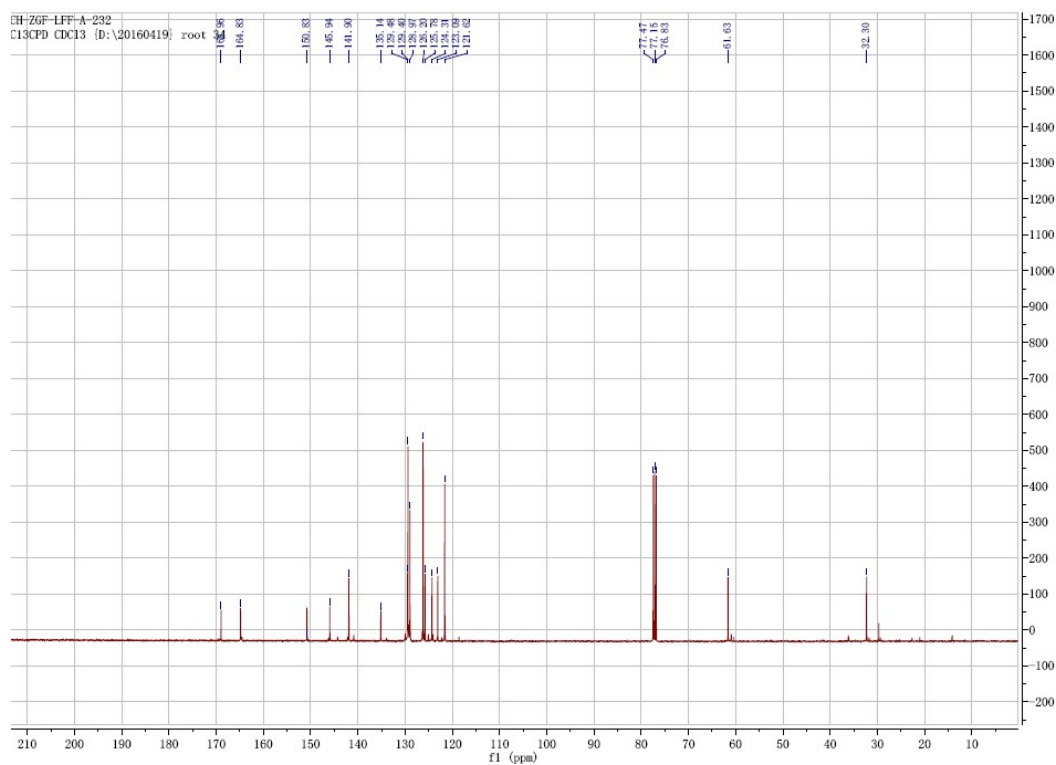

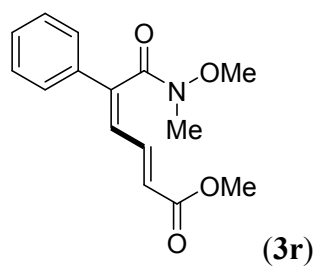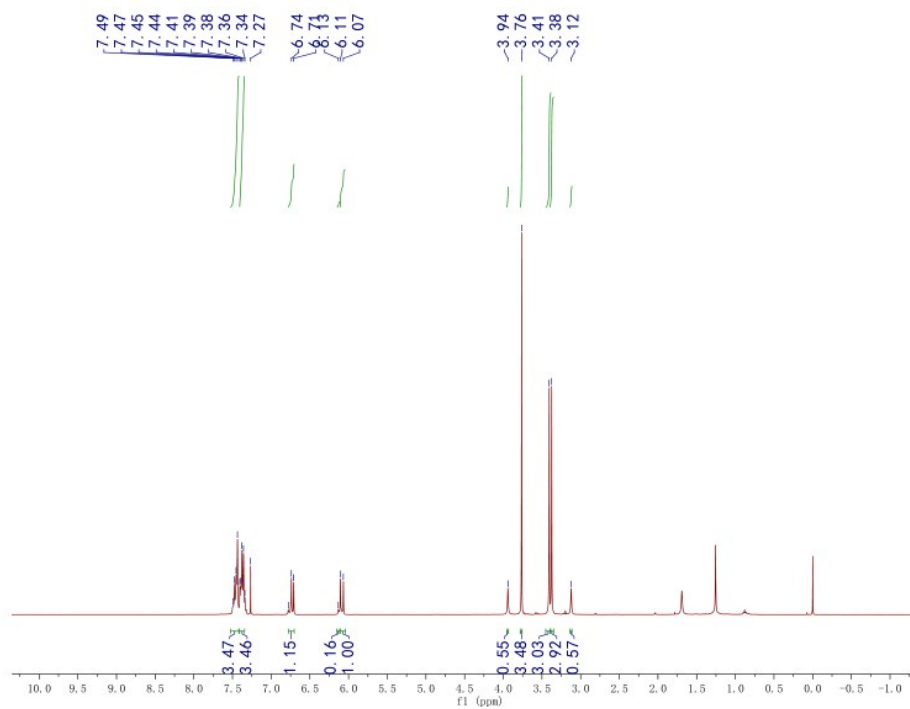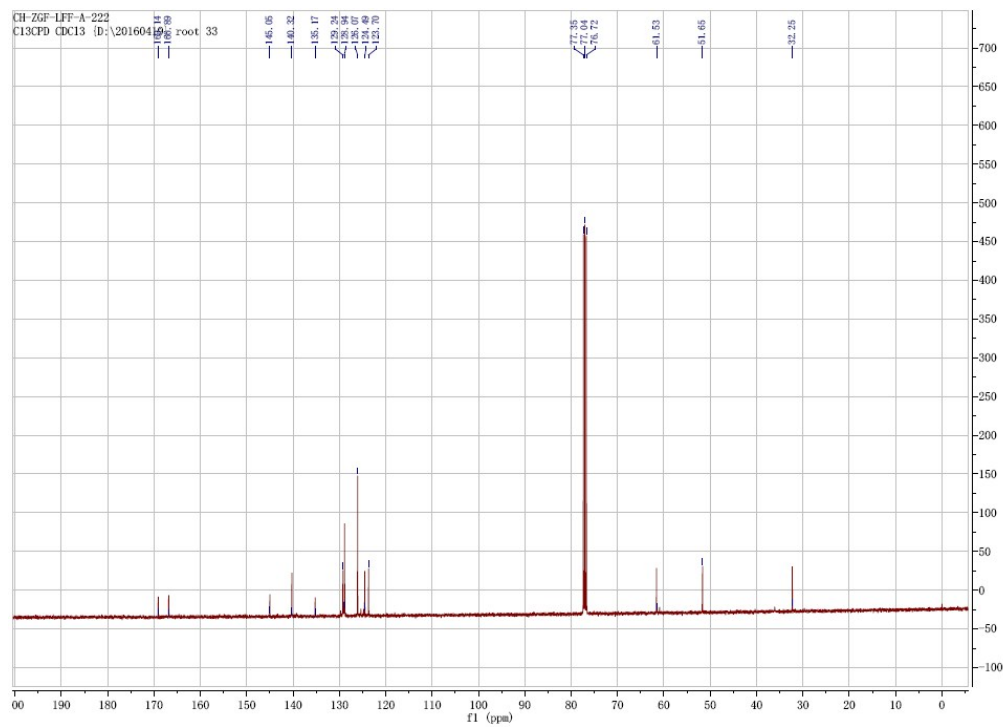

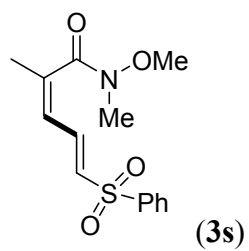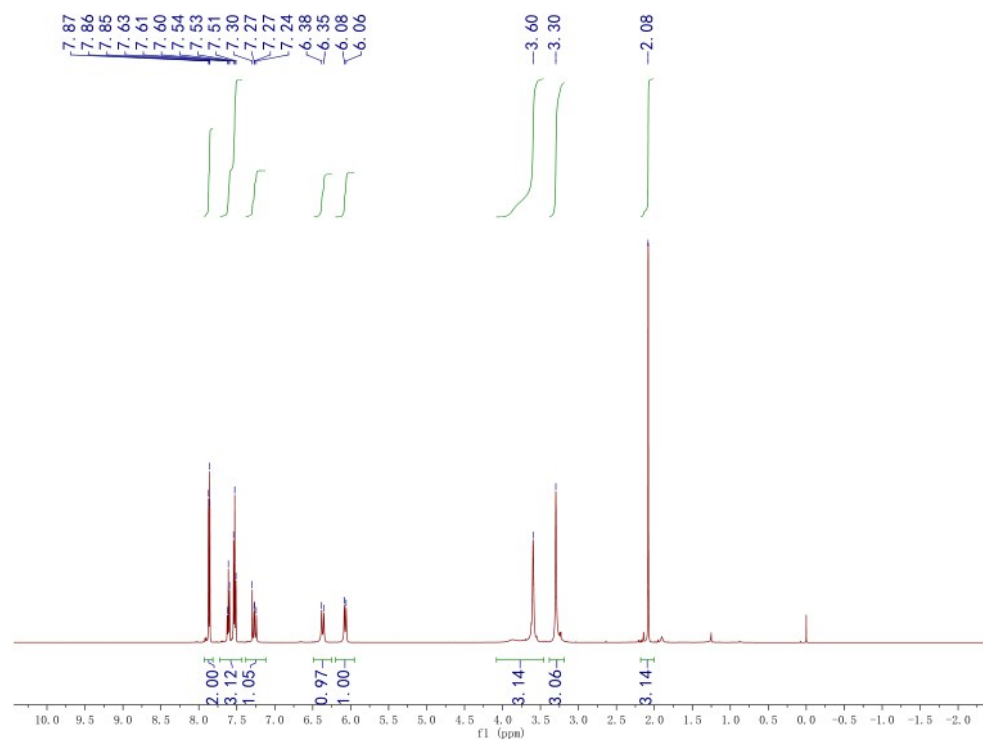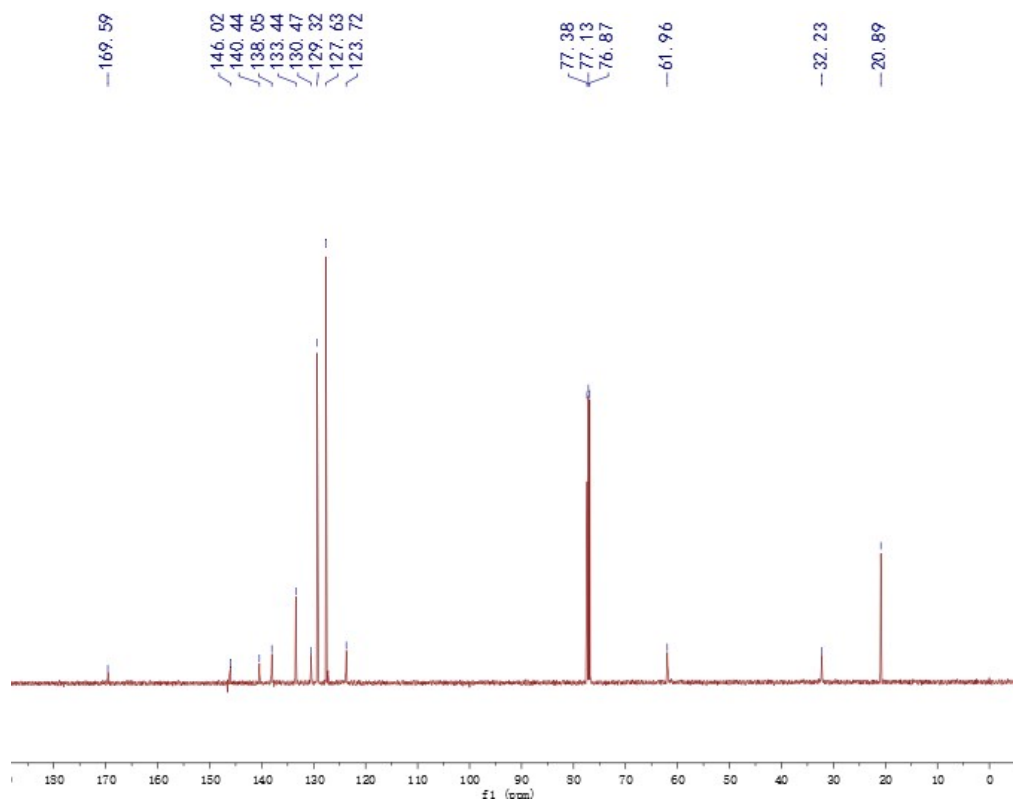



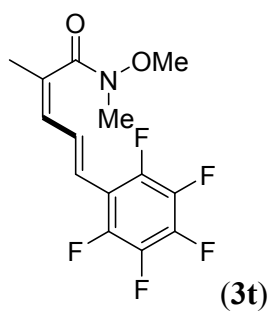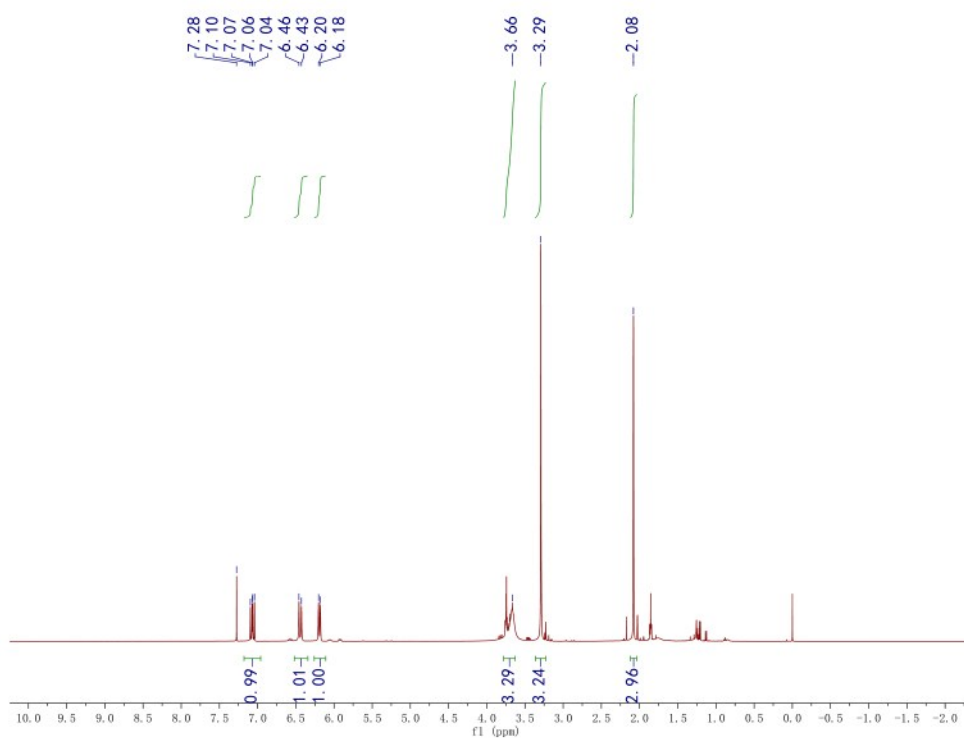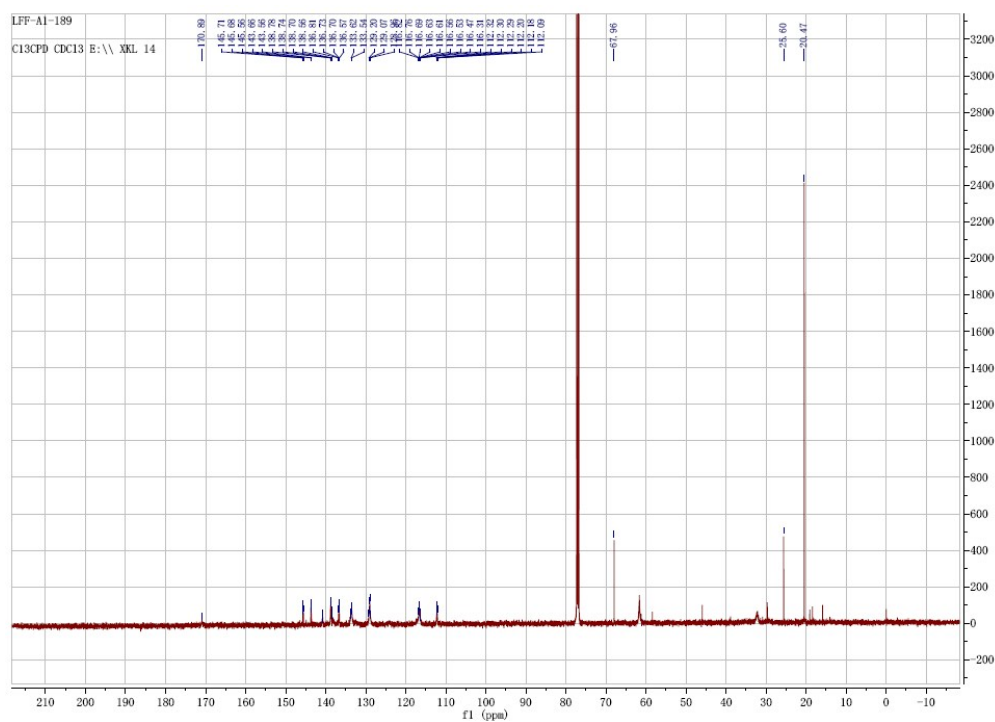

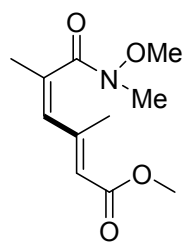

(3u)

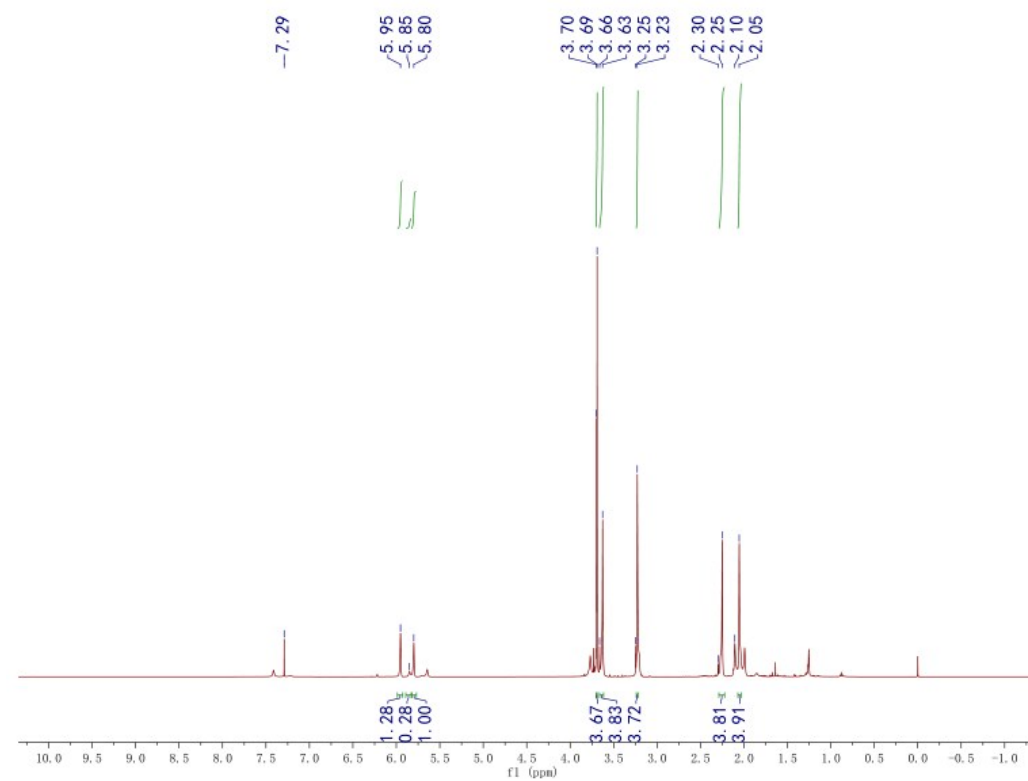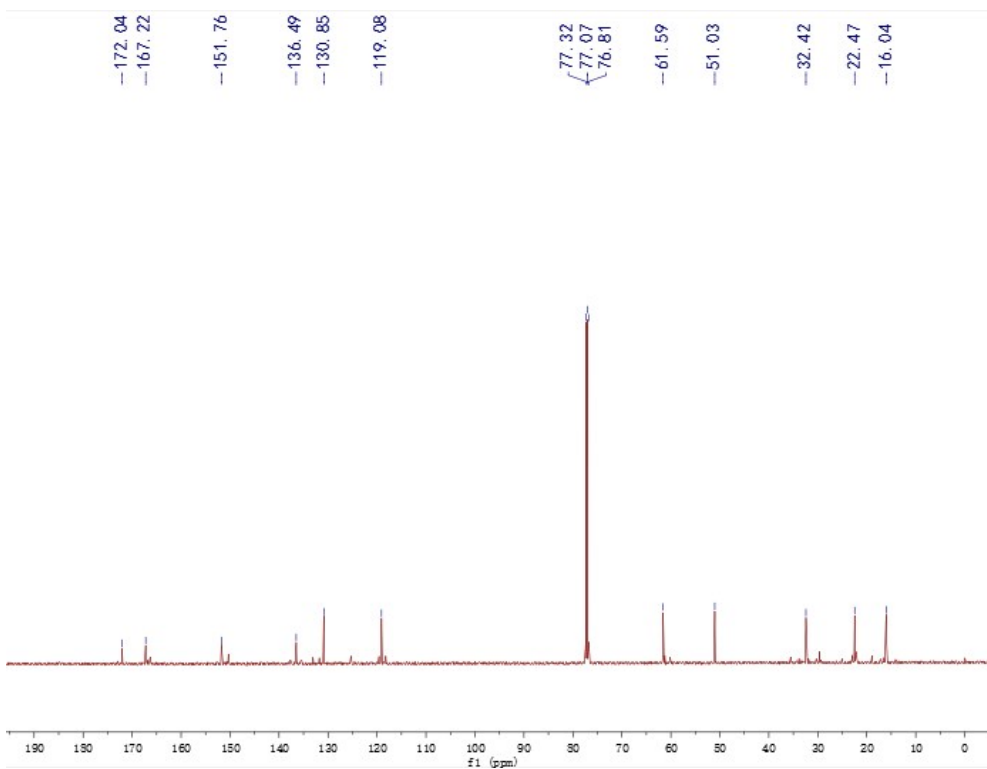

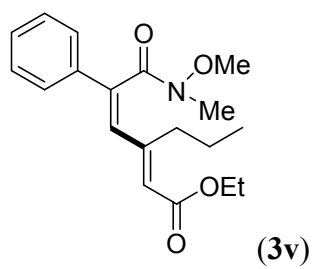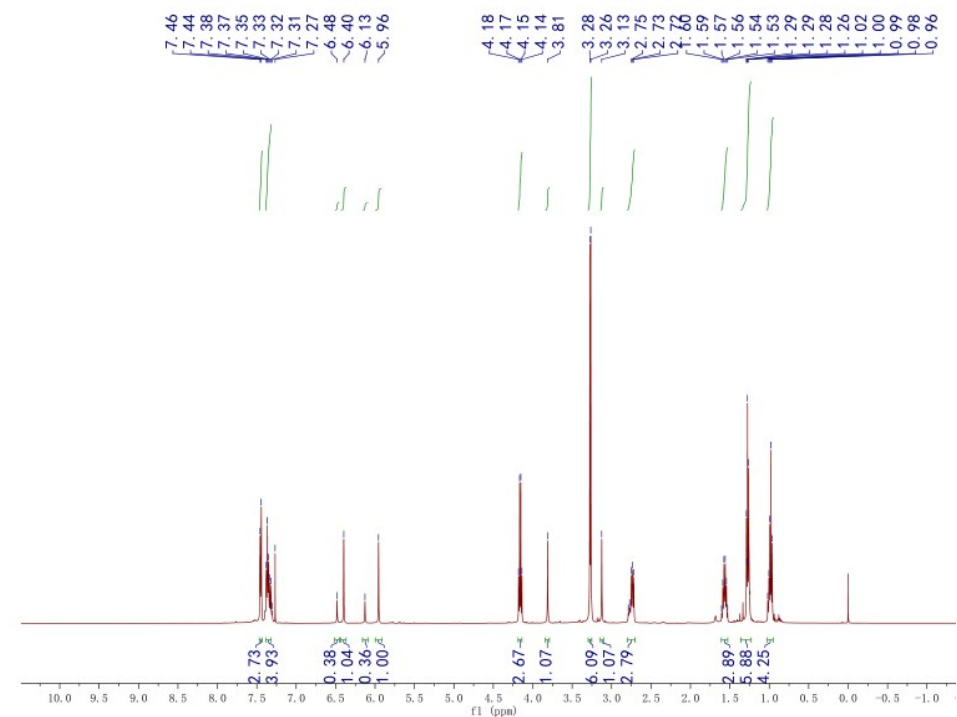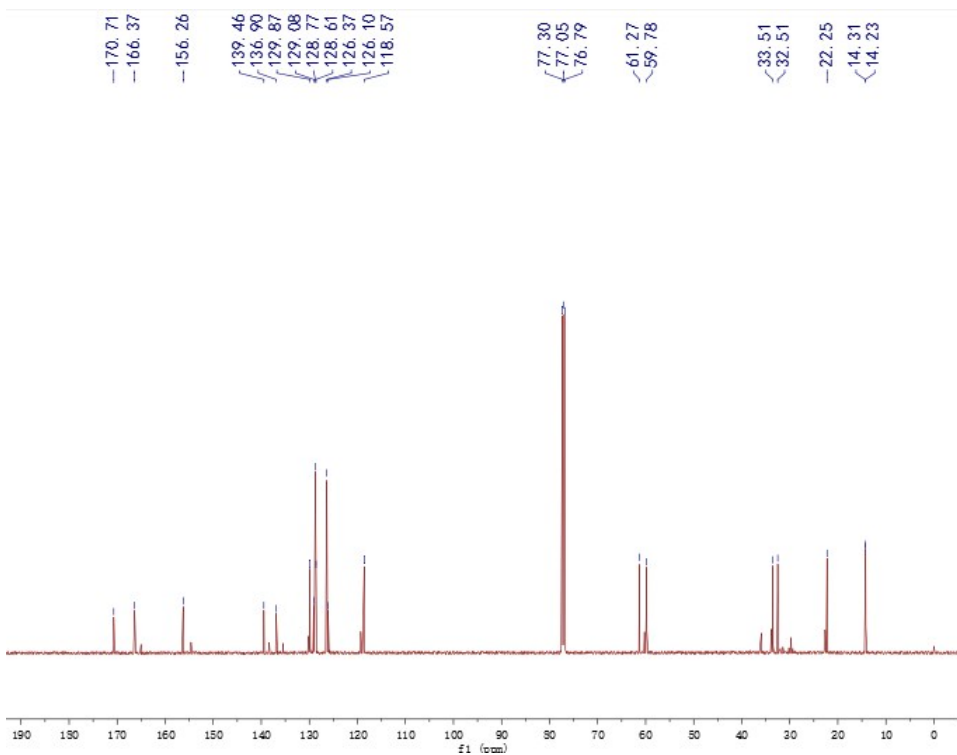

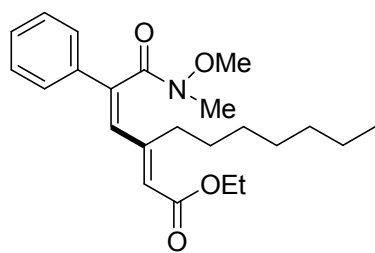

(3w)

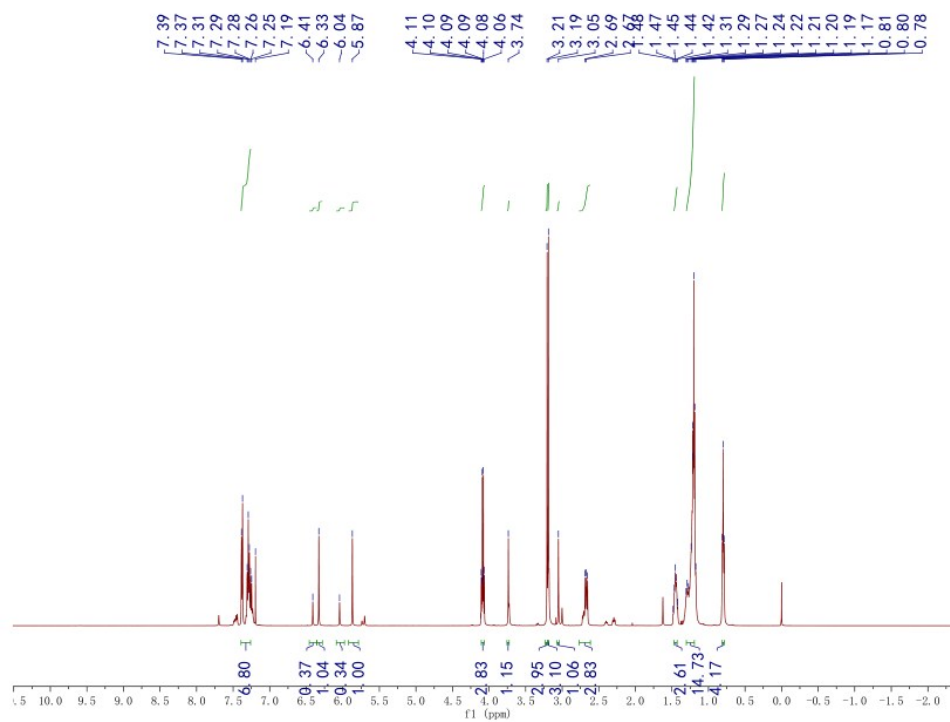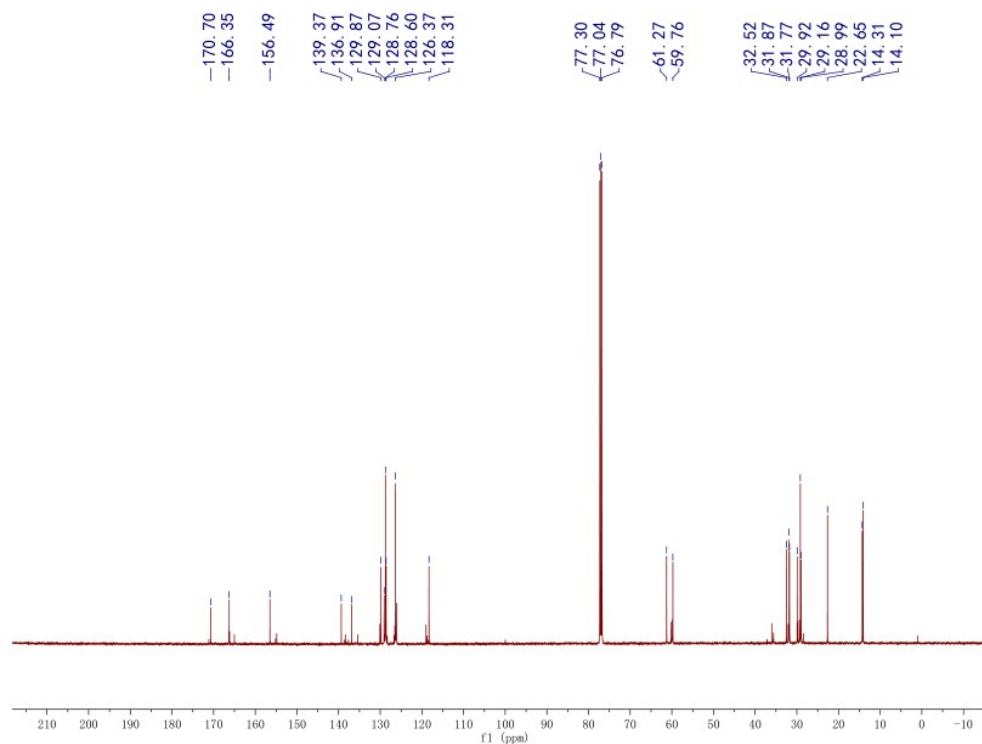

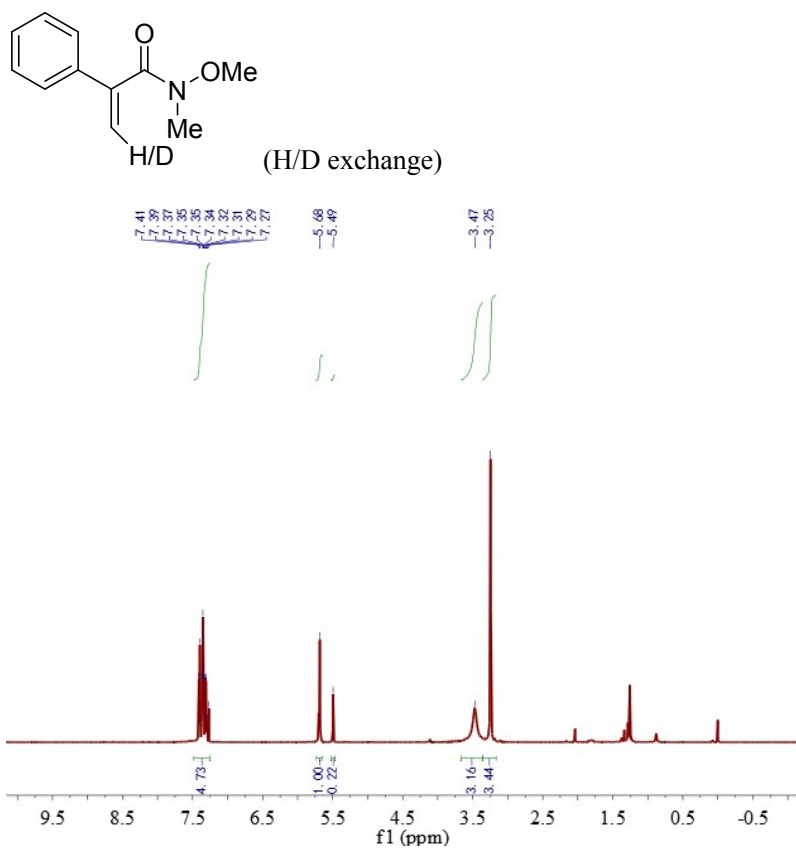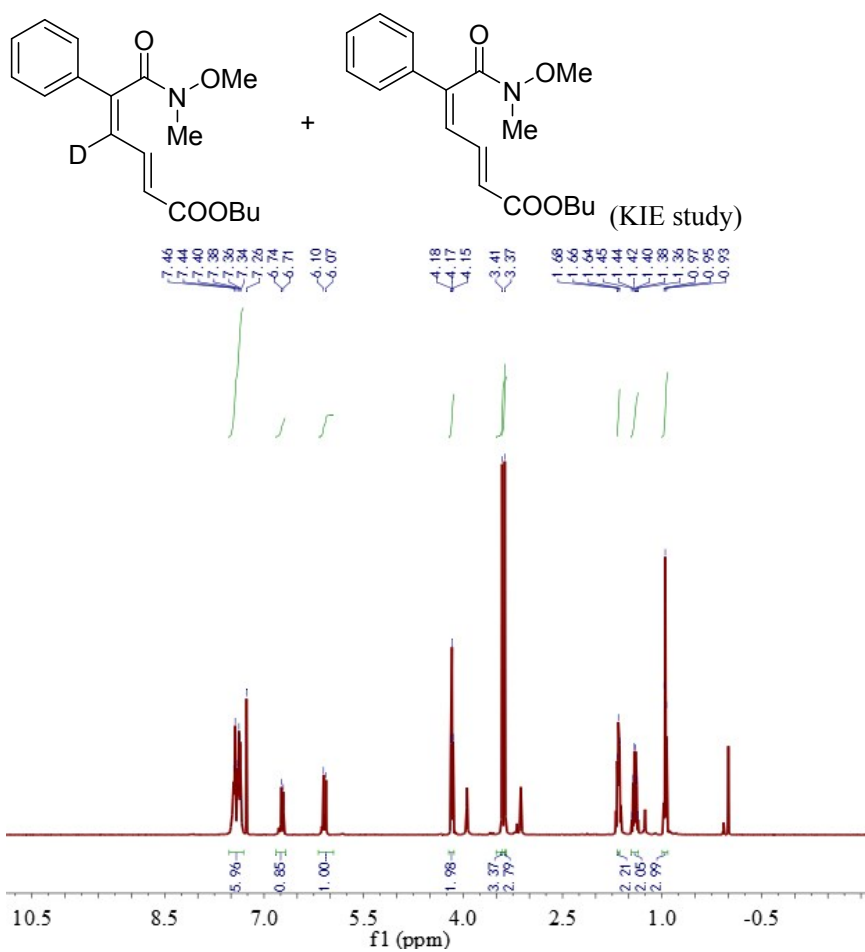

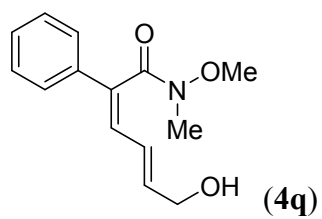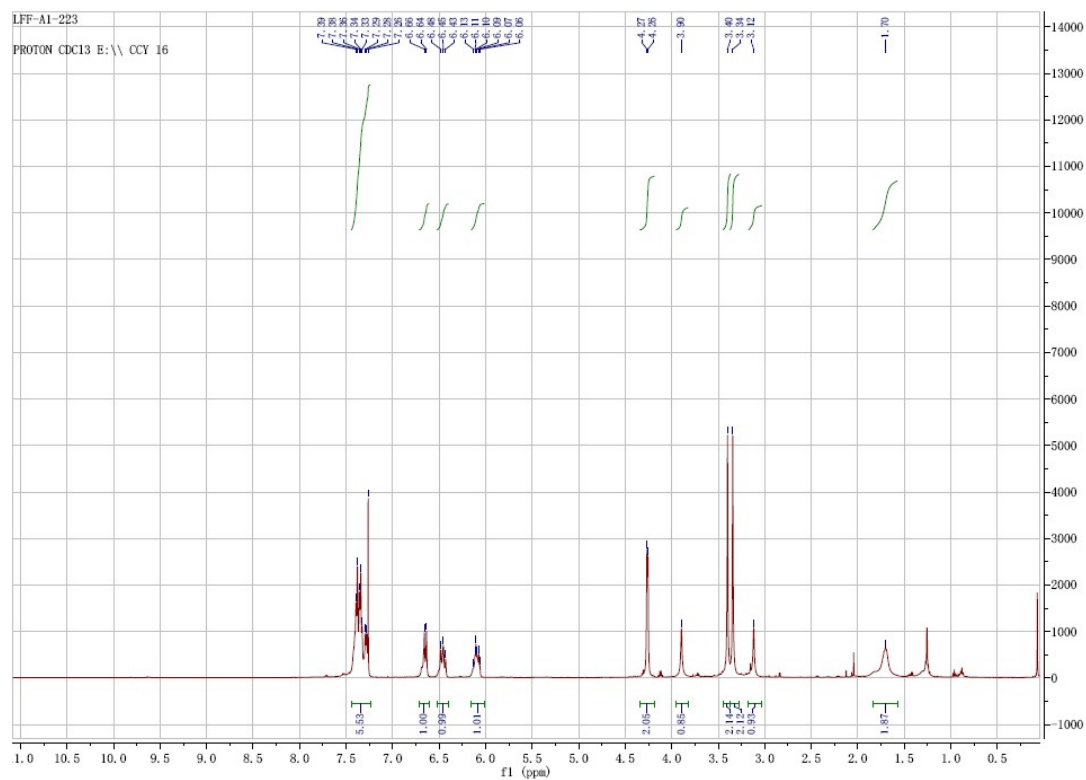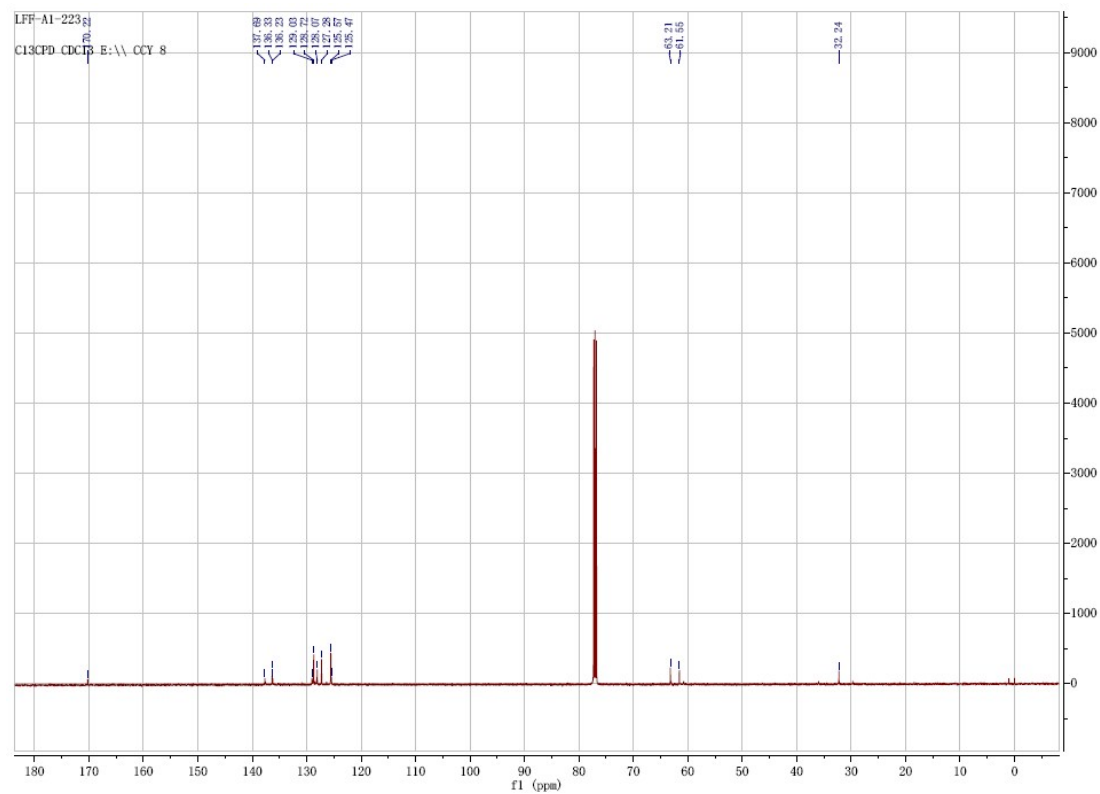

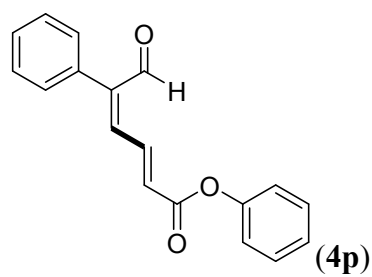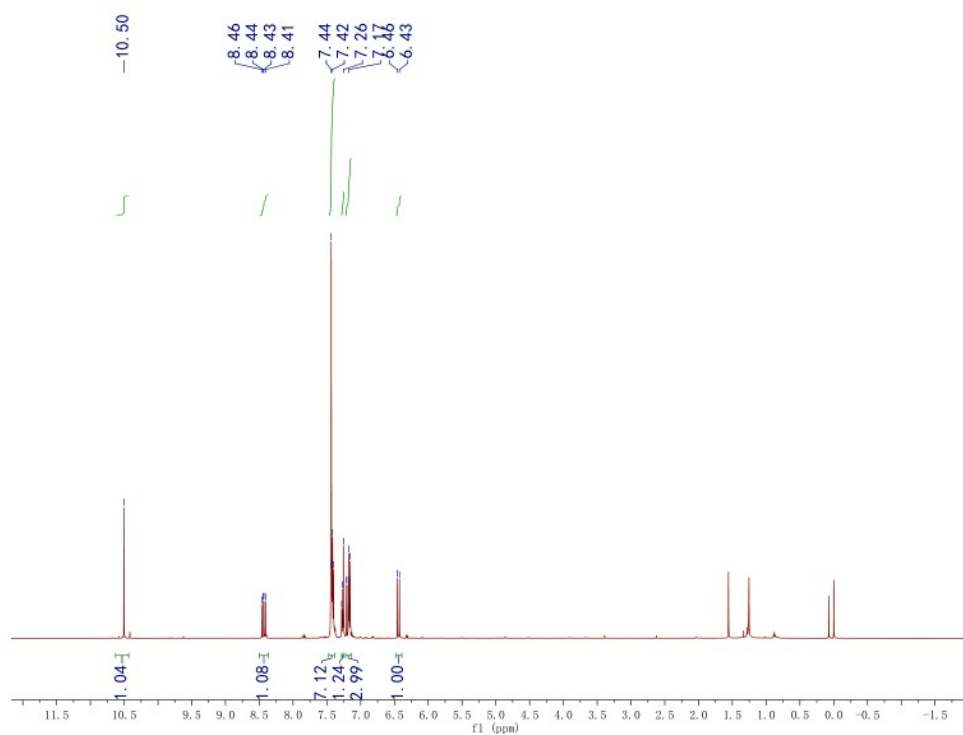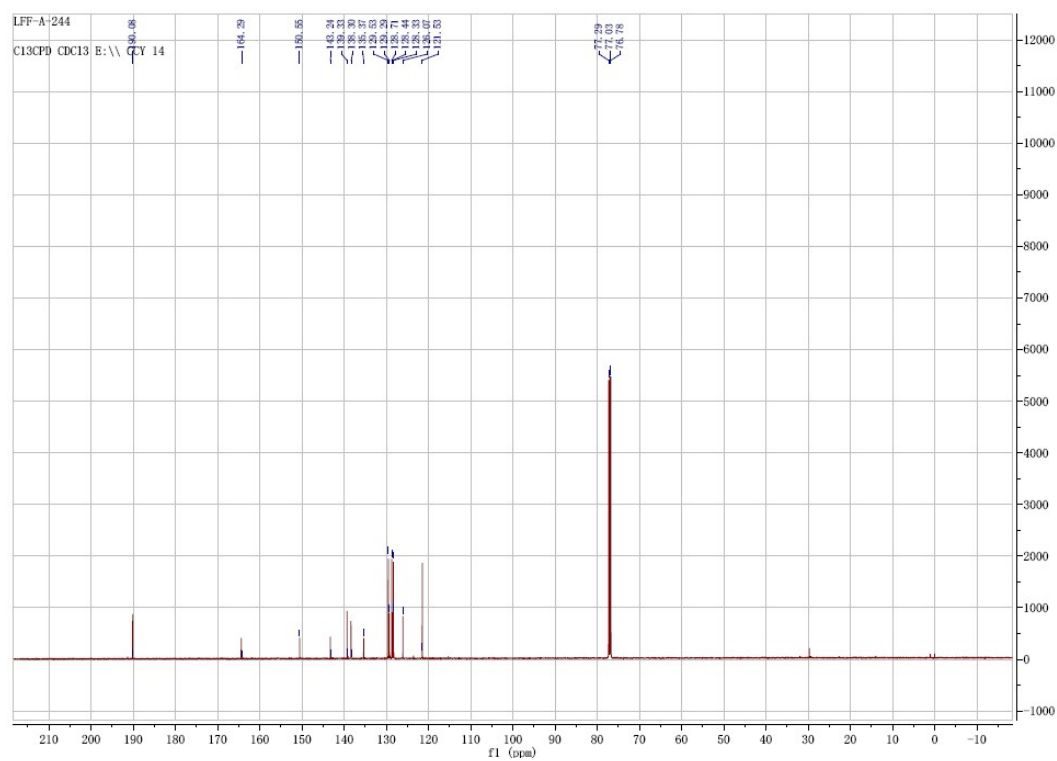

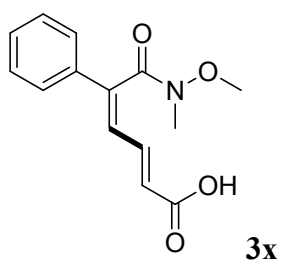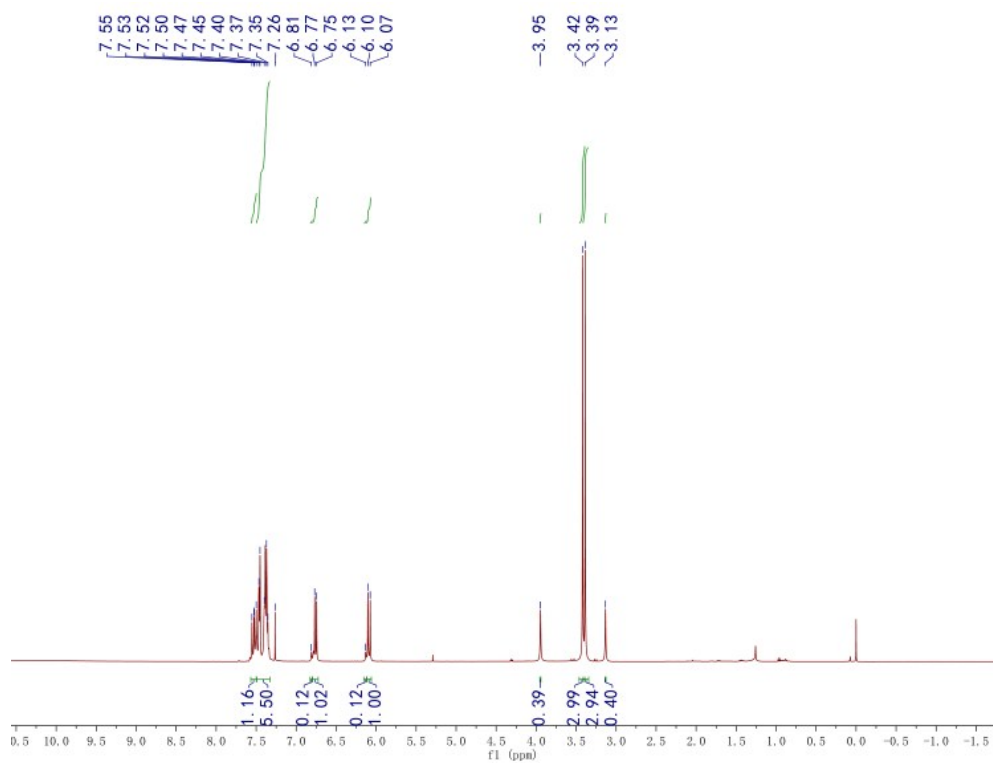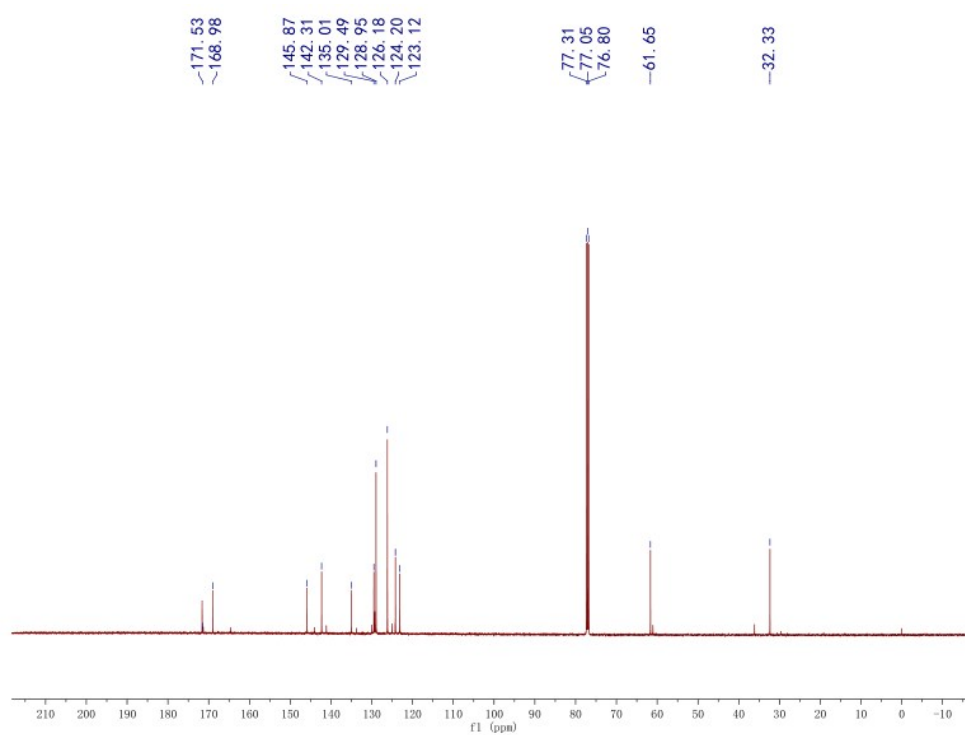



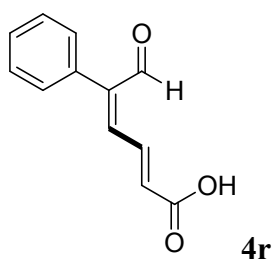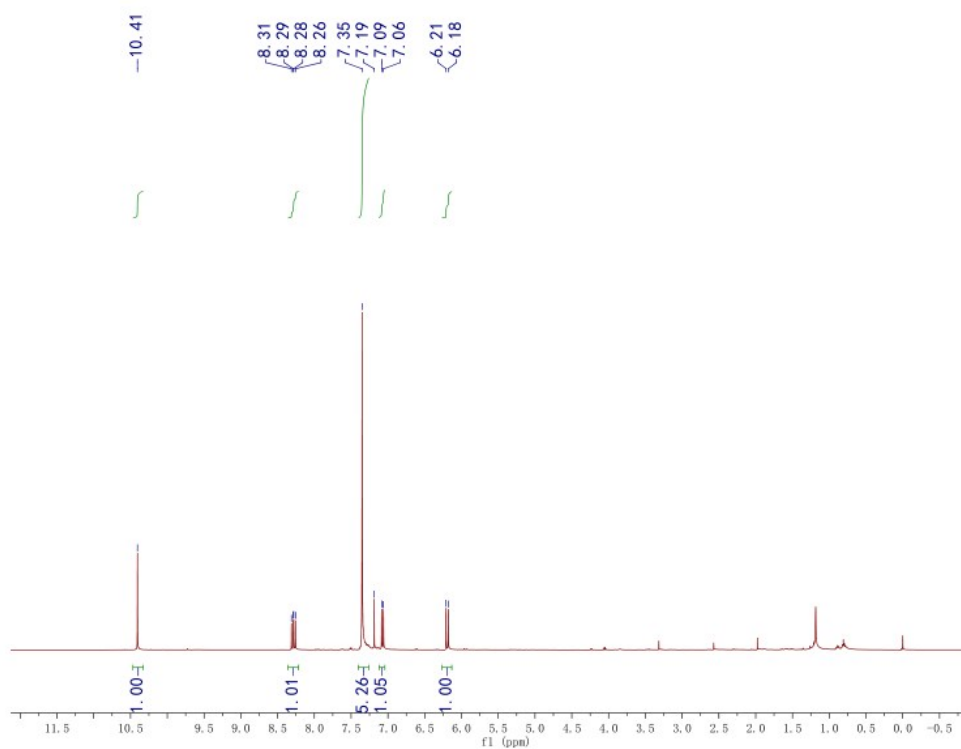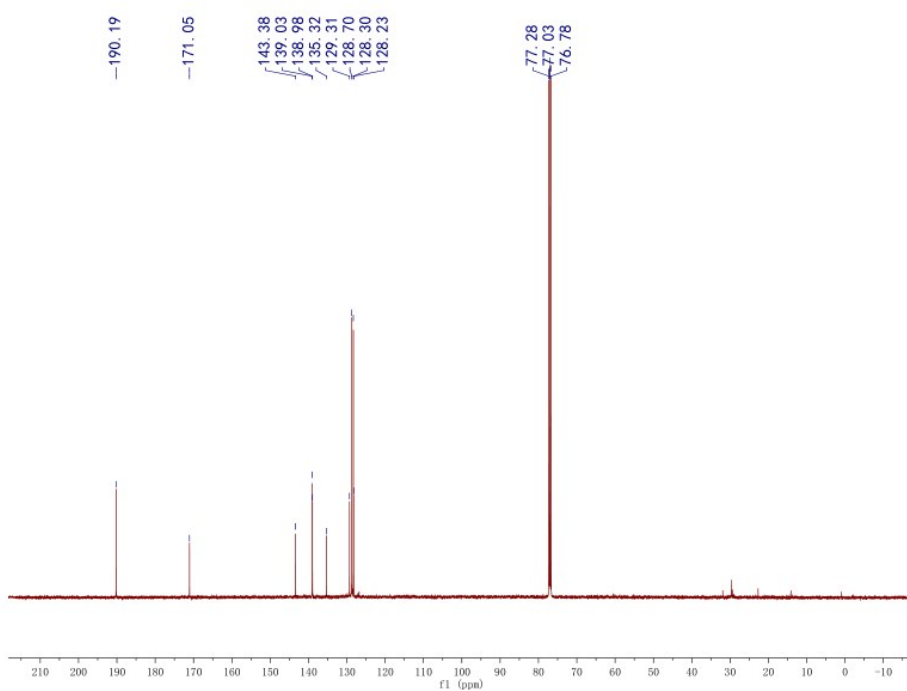

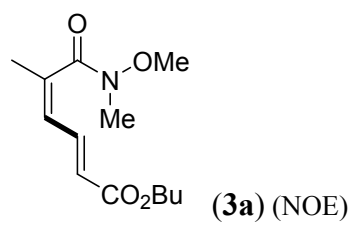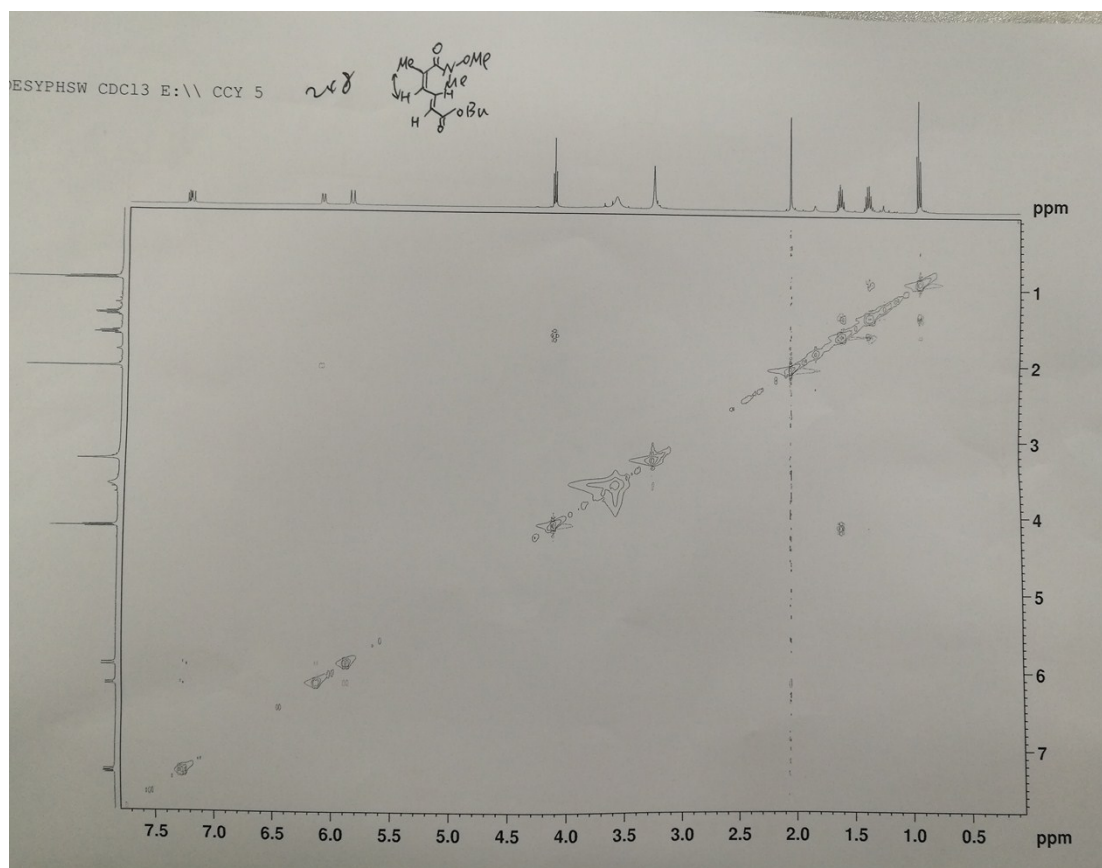

Supplement: c7ob00026j1.pdf [file c7ob00026j1.pdf]
